# Supplementary material for: A regioselective synthesis of β-difluoromethoxy vinyl sulfonesvia O-difluoromethylation of β-ketosulfones using sodium chlorodifluoroacetate
Source: Royal Society of Chemistry journal article supplement (doi:10.1039/d3ob01142a), 2023-01-01

## Electronic Supplementary Information

### **A regioselective synthesis of $\beta$ -difluoromethoxy vinyl sulfones via *O*-difluoromethylation of $\beta$ -ketosulfones using sodium chlorodifluoroacetate**

Km Ishu, Neha Sharma Prabhakar, and Krishna Nand Singh\*

Department of Chemistry, Institute of Science, Banaras Hindu University, Varanasi 221005,  
India

\*E-mail: knsingh@bhu.ac.in; knsinghbhu@yahoo.co.in

### Table of Contents

|                                                                           |         |
|---------------------------------------------------------------------------|---------|
| 1. Copies of $^1\text{H}$ , $^{19}\text{F}$ , and $^{13}\text{C}$ Spectra | S2-S29  |
| 2. Crystallographic Data                                                  | S30-S31 |

# 1. Copies of $^1\text{H}$ , $^{19}\text{F}$ , and $^{13}\text{C}$ Spectra

## $^1\text{H}$ NMR (500 MHz, $\text{CDCl}_3$ )

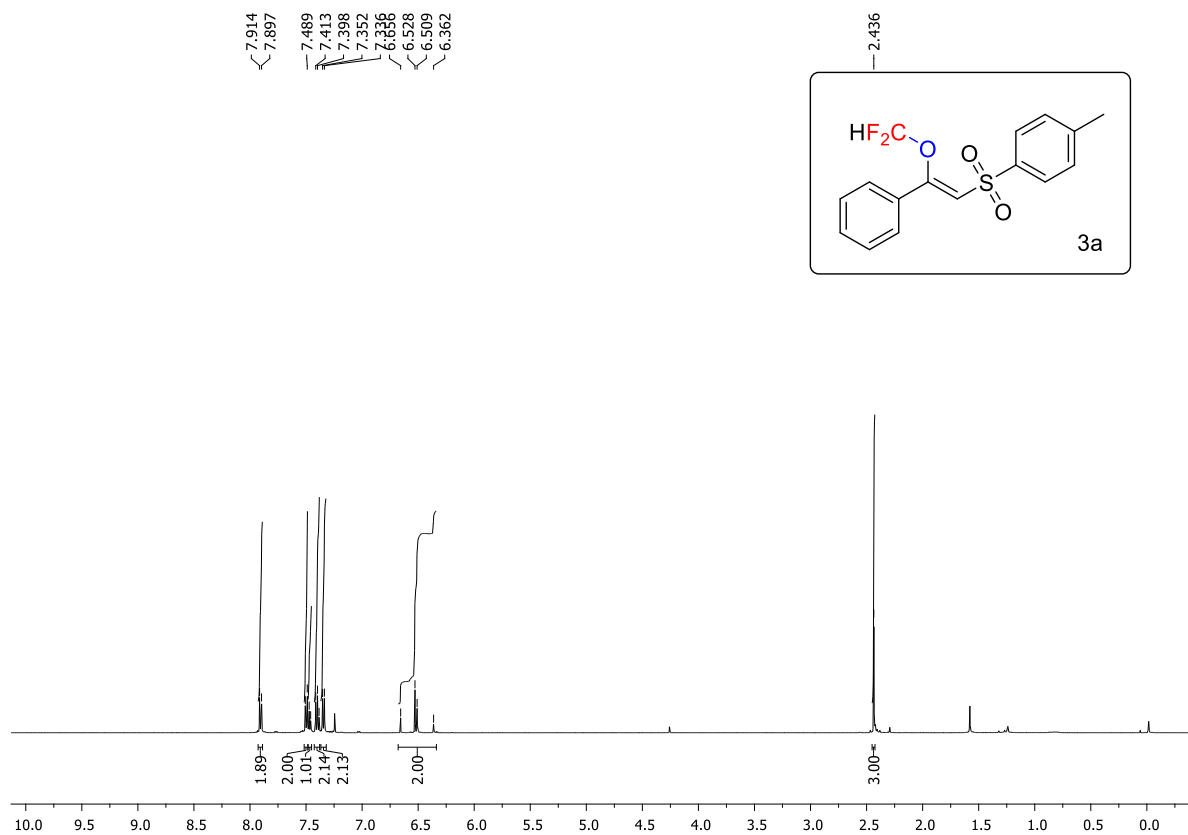

## $^{19}\text{F}$ NMR (471 MHz, $\text{CDCl}_3$ )

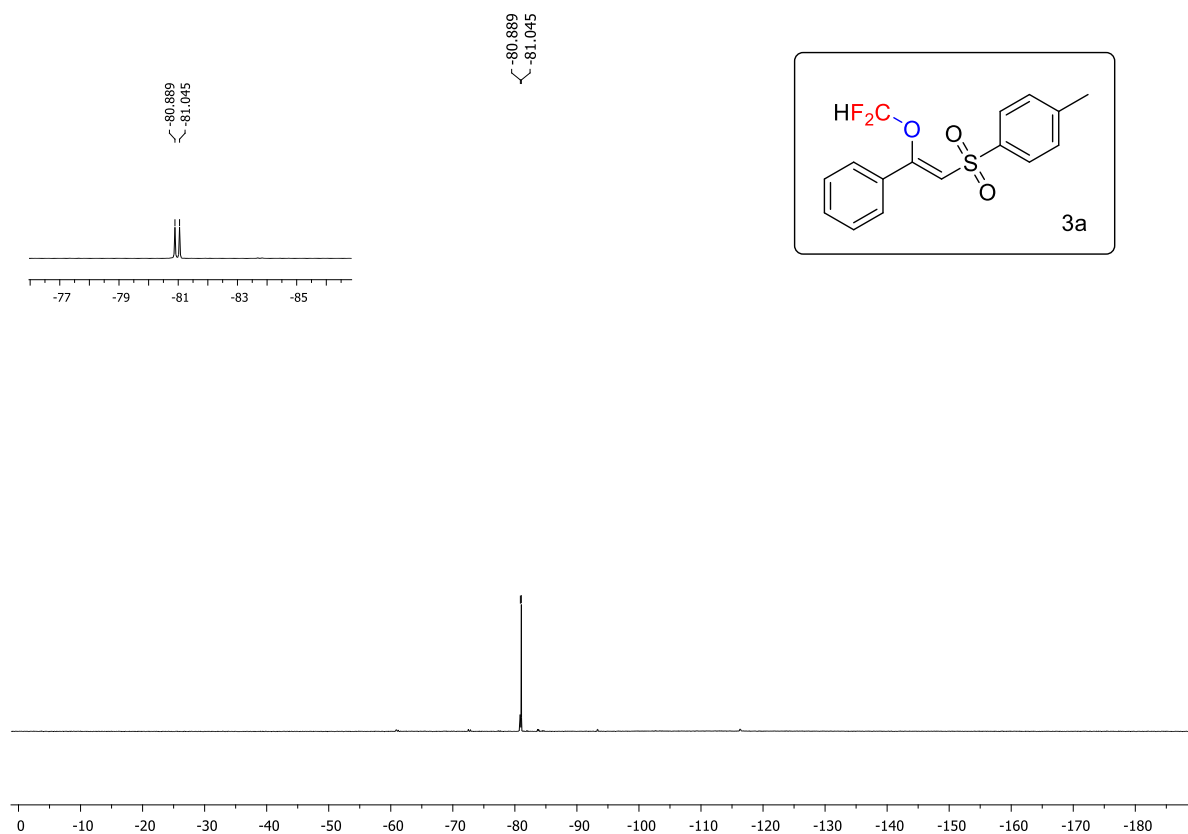

### $^{13}\text{C}\{^1\text{H}\}$ NMR (151 MHz, $\text{CDCl}_3$ )

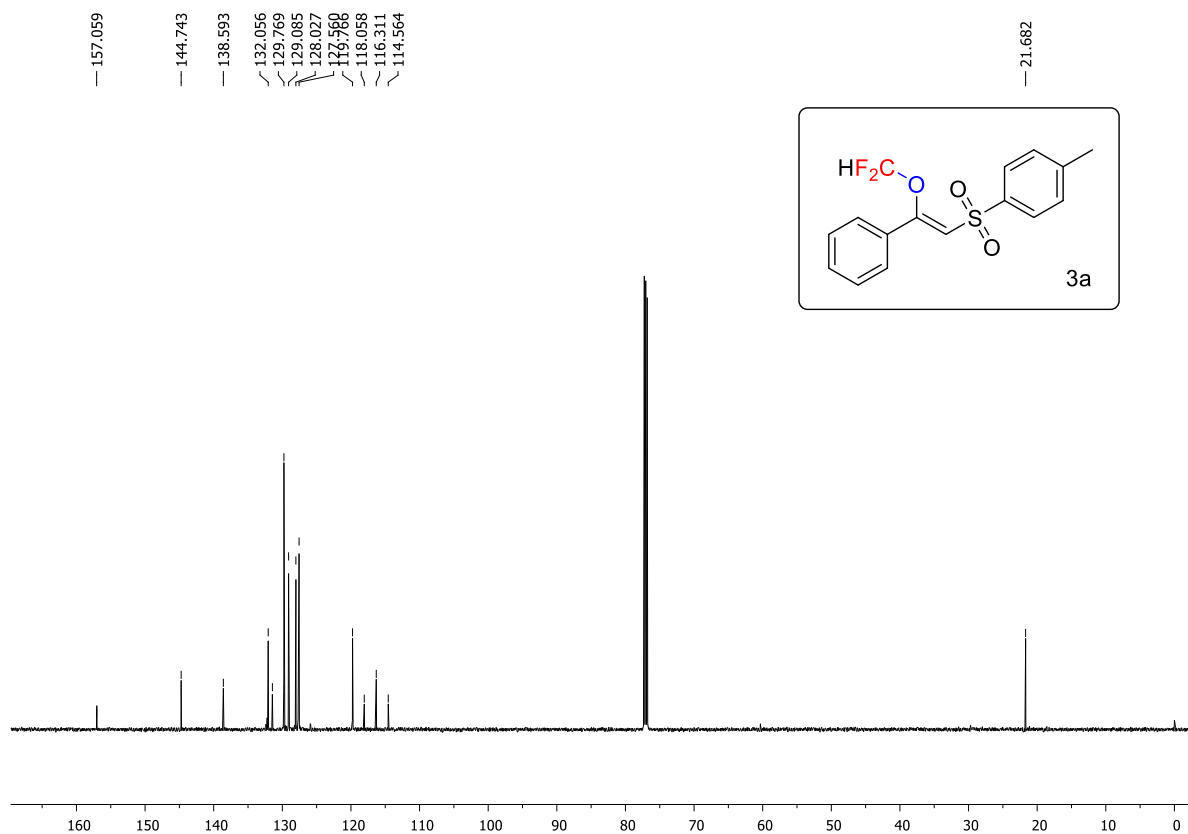

### $^1\text{H}$ NMR (500 MHz, $\text{CDCl}_3$ )

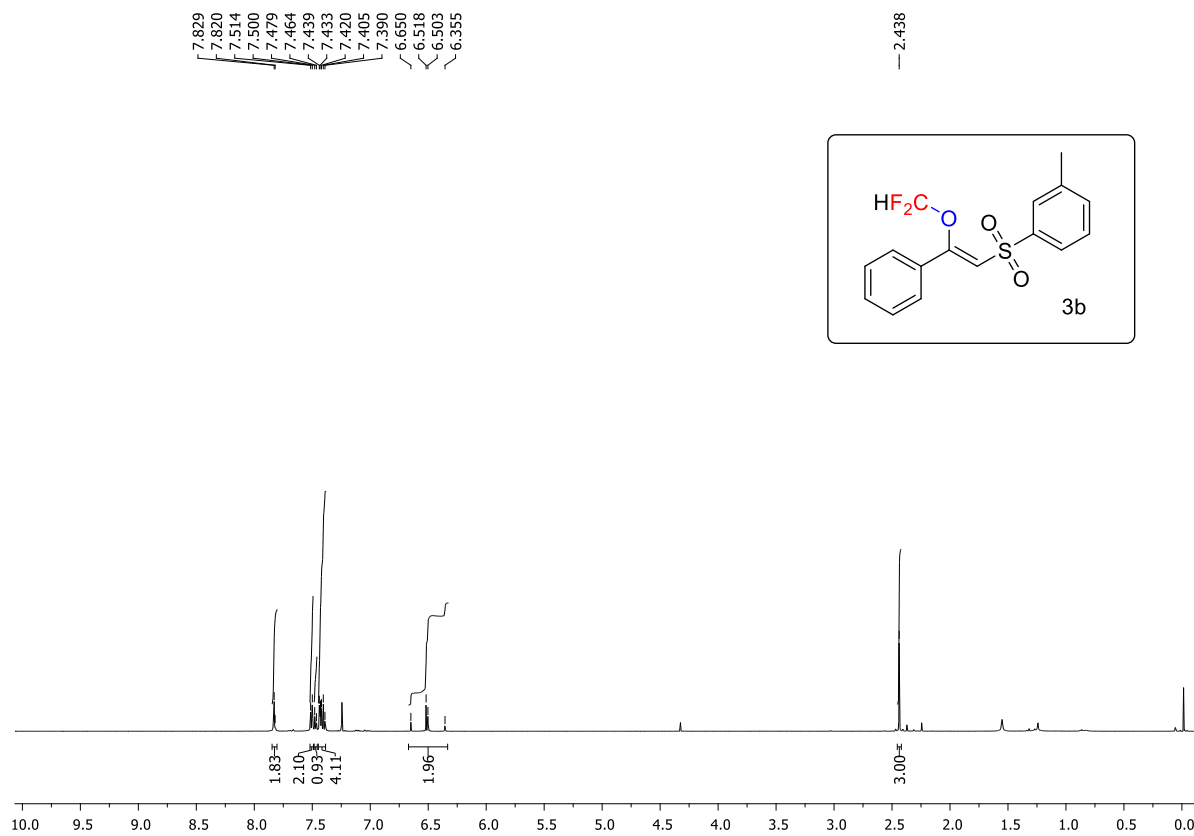

### $^{19}\text{F}$ NMR (471 MHz, $\text{CDCl}_3$ )

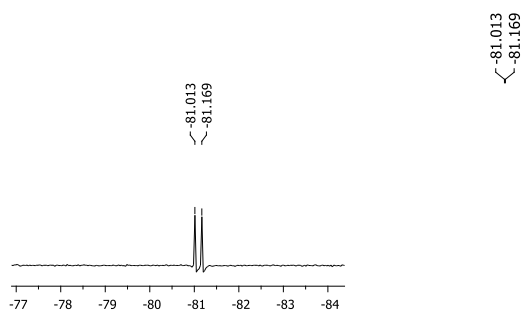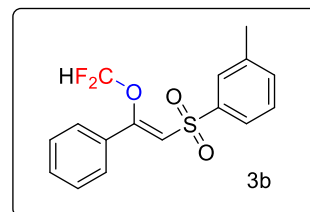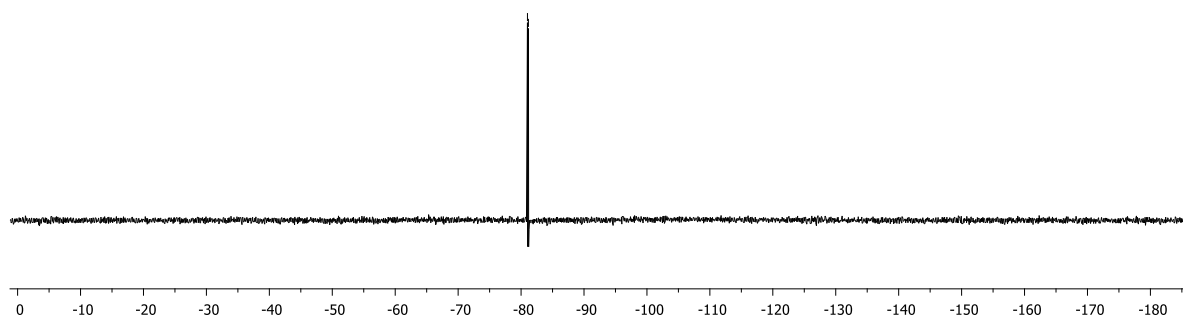

### $^{13}\text{C}\{^1\text{H}\}$ NMR (151 MHz, $\text{CDCl}_3$ )

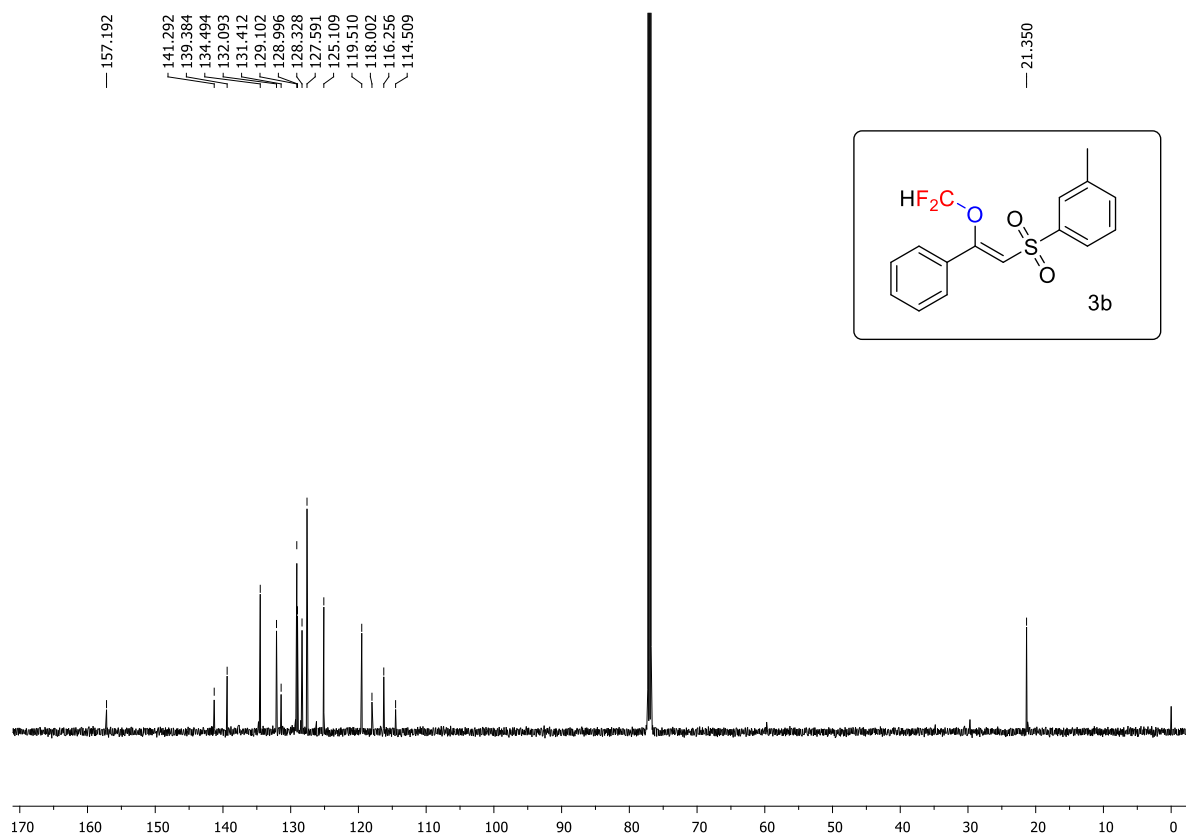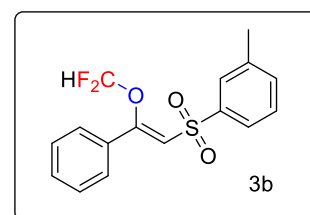

# $^1\text{H}$ NMR (500 MHz, $\text{CDCl}_3$ )

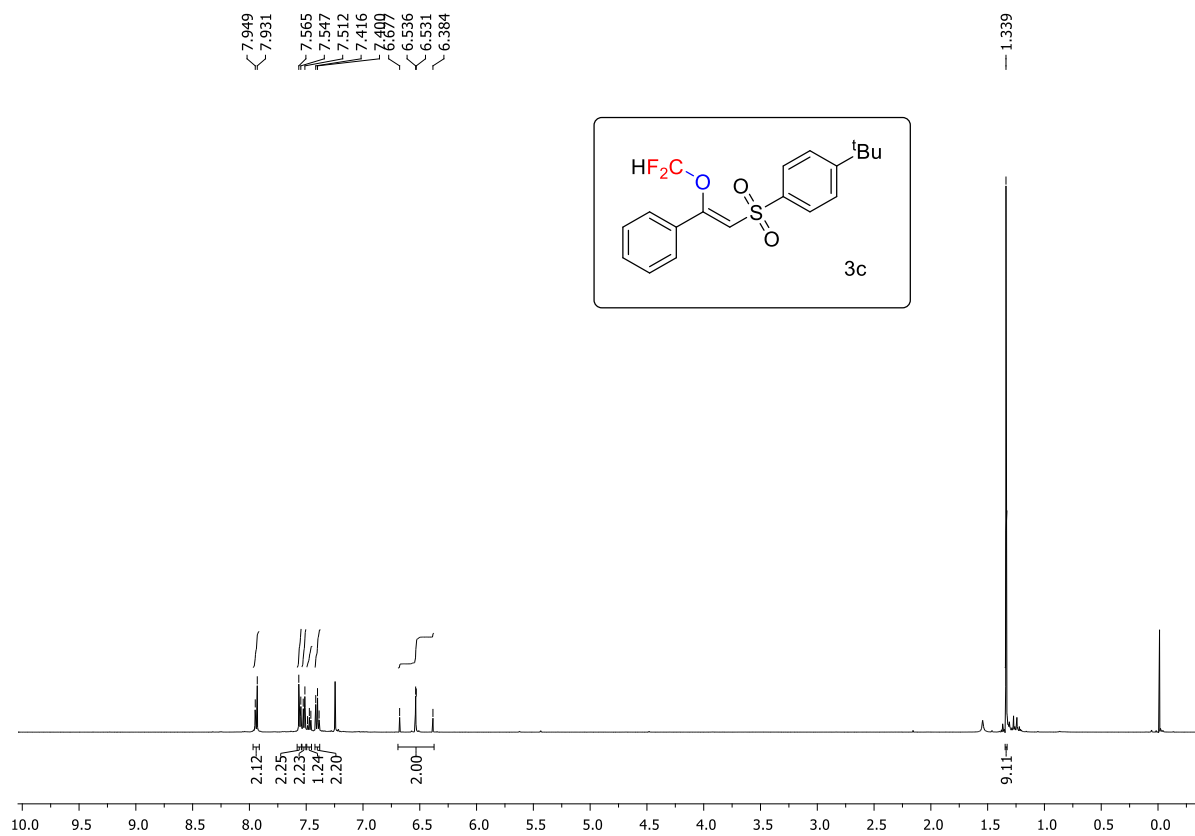

# $^{19}\text{F}$ NMR (471 MHz, $\text{CDCl}_3$ )

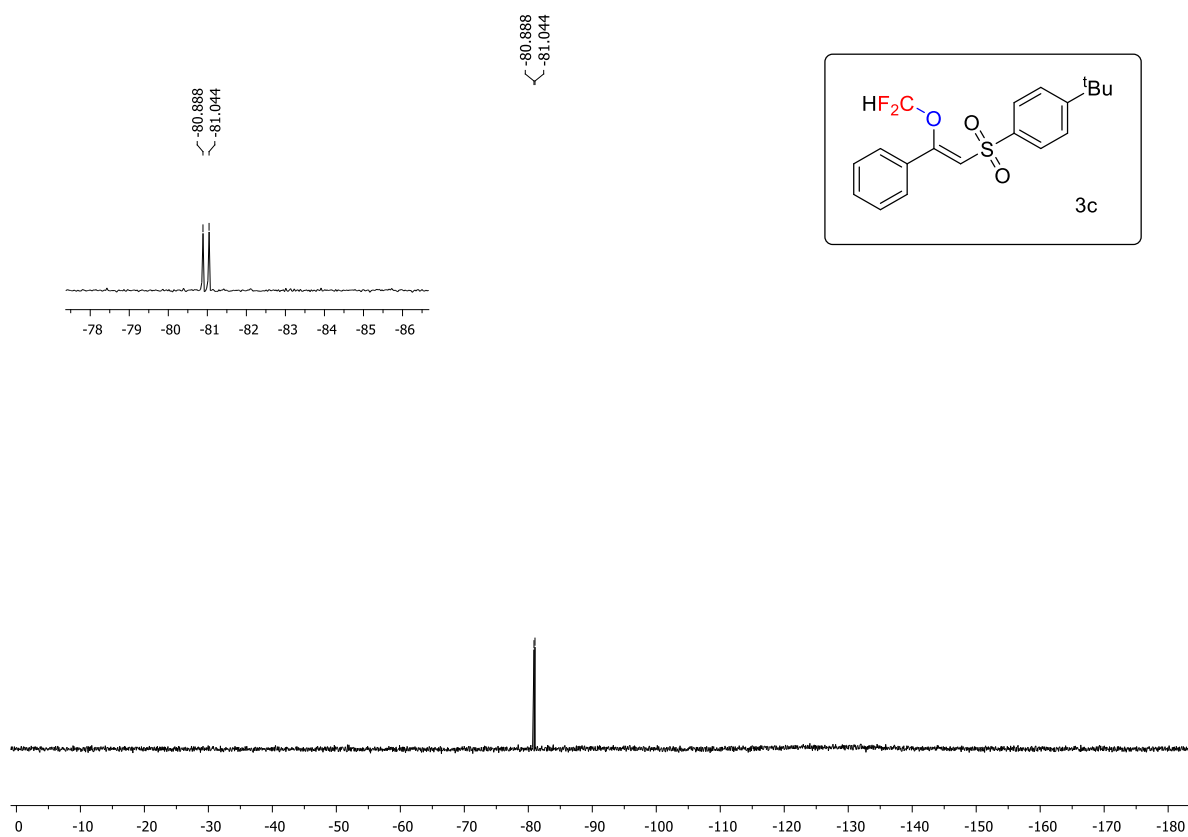

$^{13}\text{C}\{^1\text{H}\}$  NMR (151 MHz,  $\text{CDCl}_3$ )

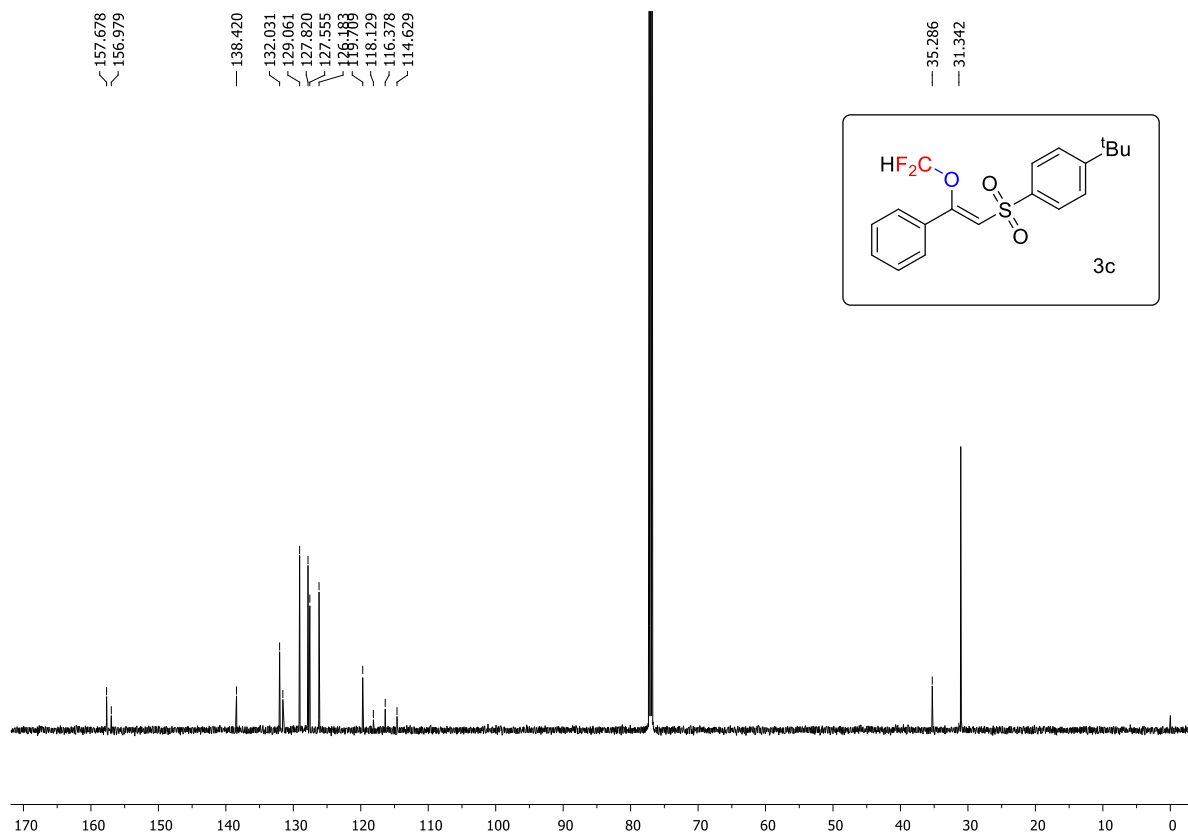

$^1\text{H}$  NMR (500 MHz,  $\text{CDCl}_3$ )

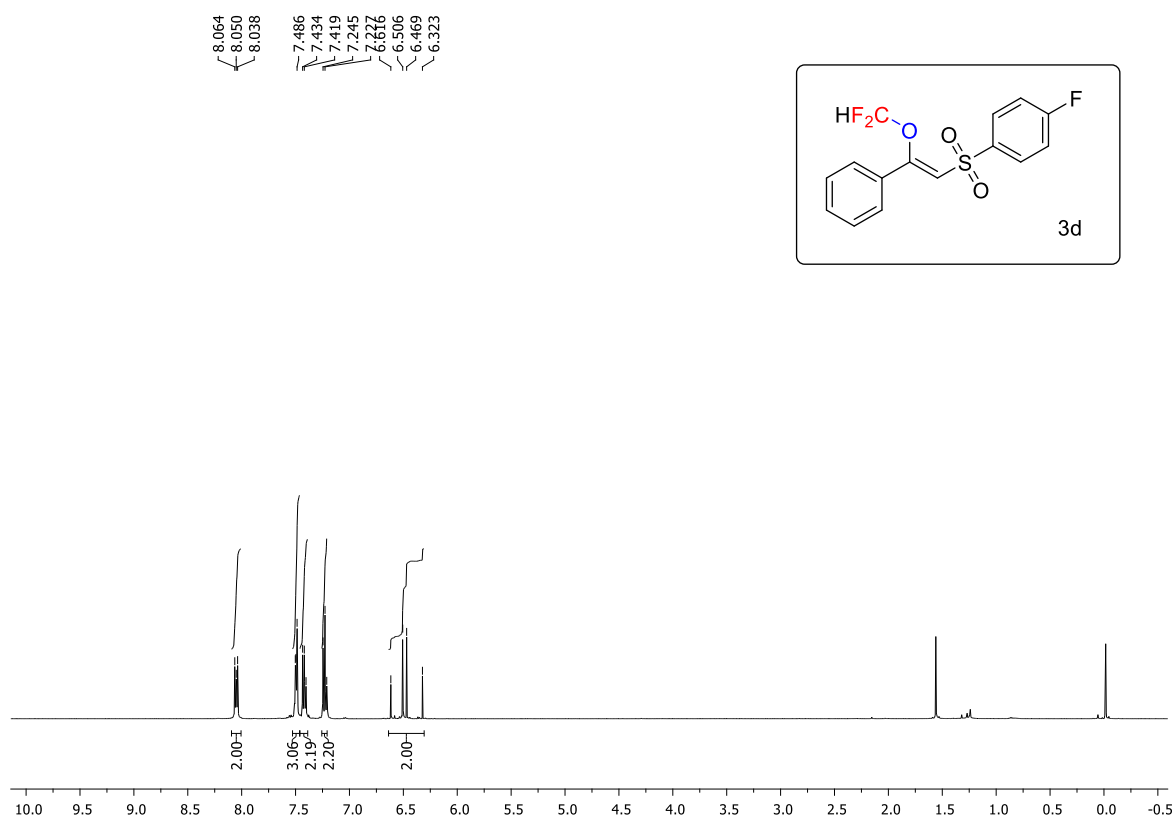

**$^{19}\text{F}$  NMR (471 MHz,  $\text{CDCl}_3$ )**

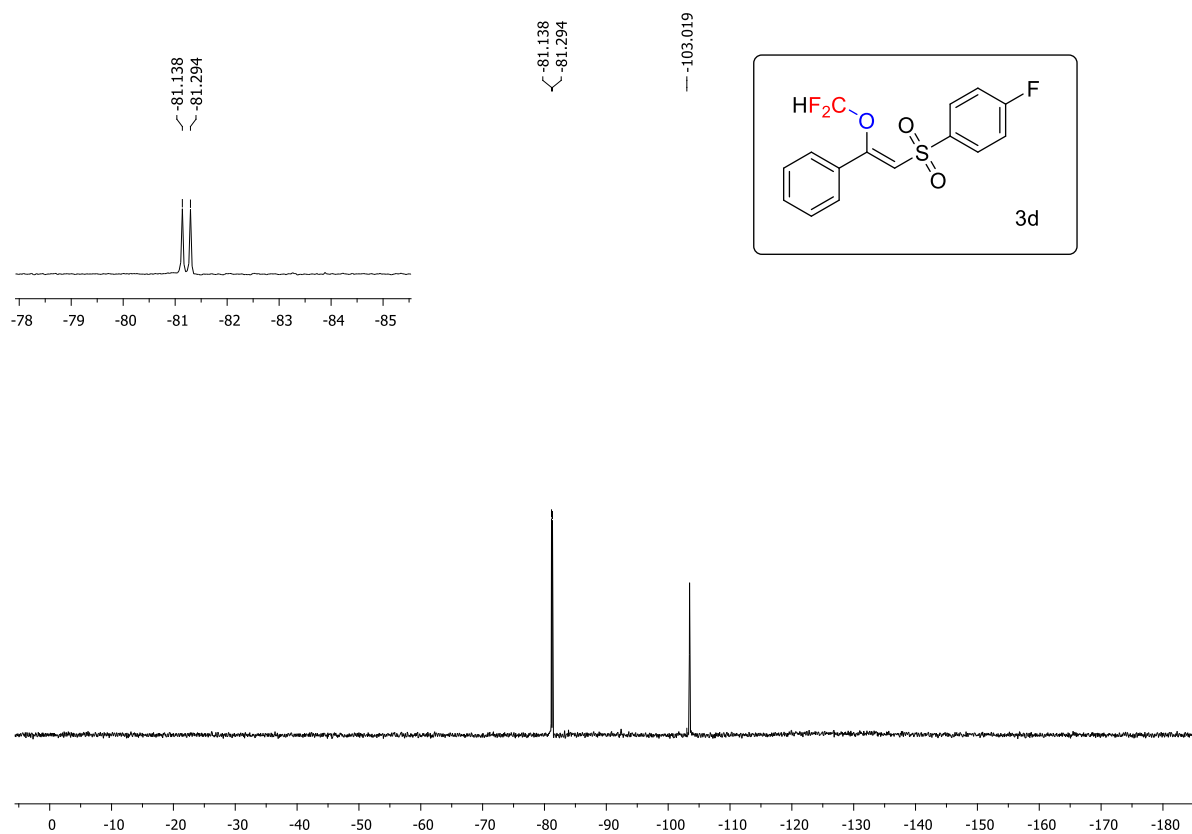

**$^{13}\text{C}\{^1\text{H}\}$  NMR (151 MHz,  $\text{CDCl}_3$ )**

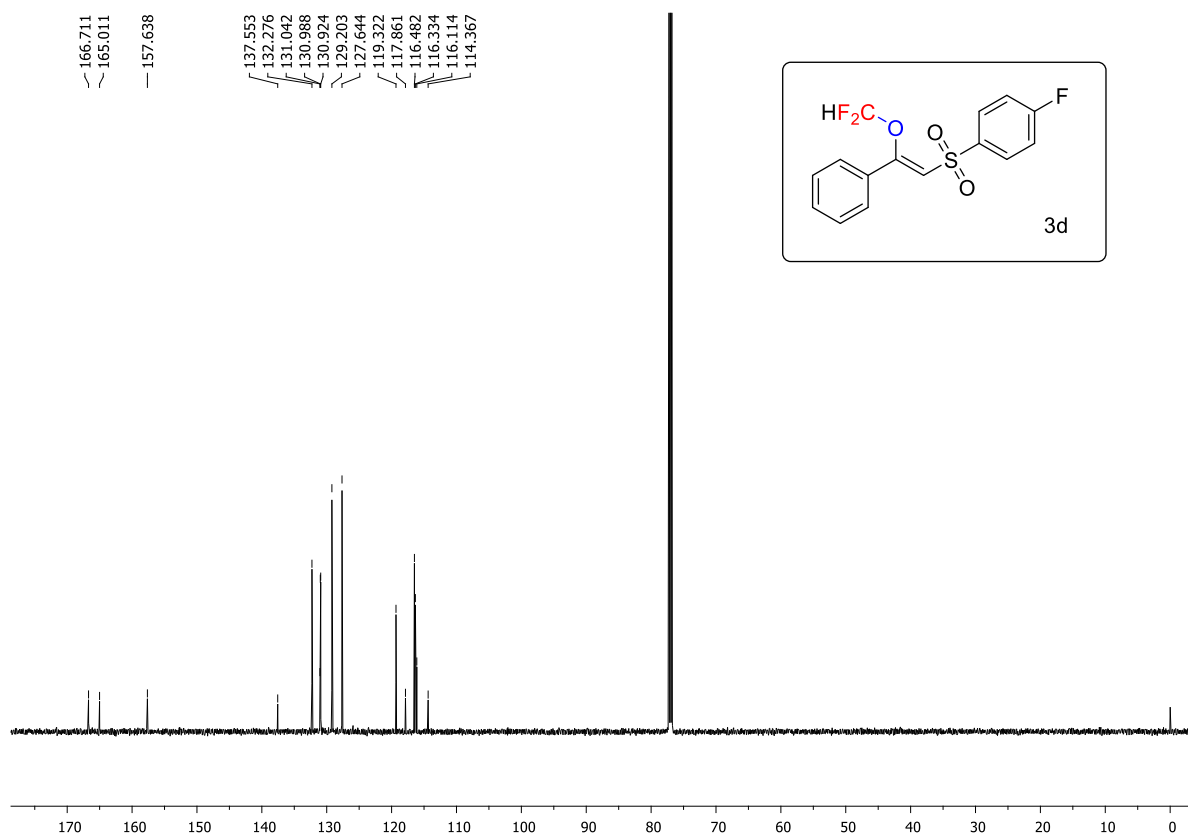

# <sup>1</sup>H NMR (500 MHz, CDCl<sub>3</sub>)

7.973  
7.957  
7.534  
7.518  
7.499  
7.484  
7.433  
6.811  
6.496  
6.465  
6.318

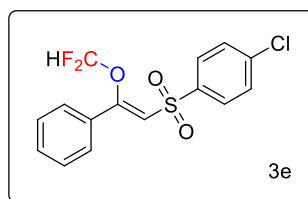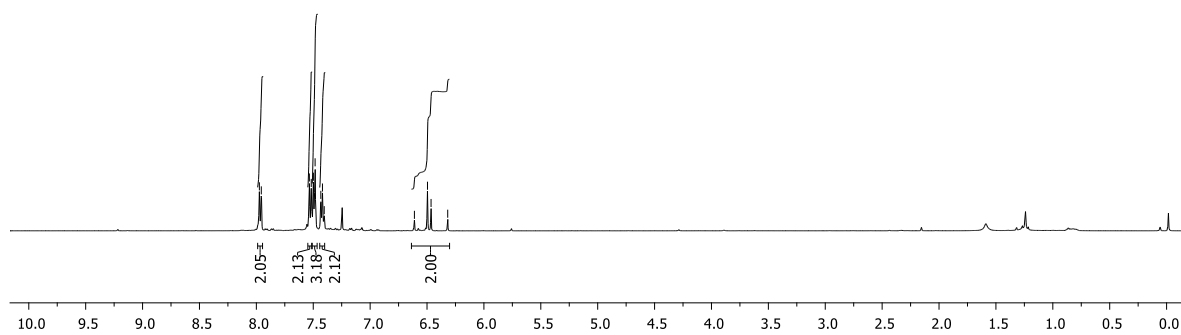

# <sup>19</sup>F NMR (471 MHz, CDCl<sub>3</sub>)

-81.109  
-81.262

-81.109  
-81.262

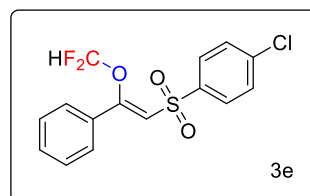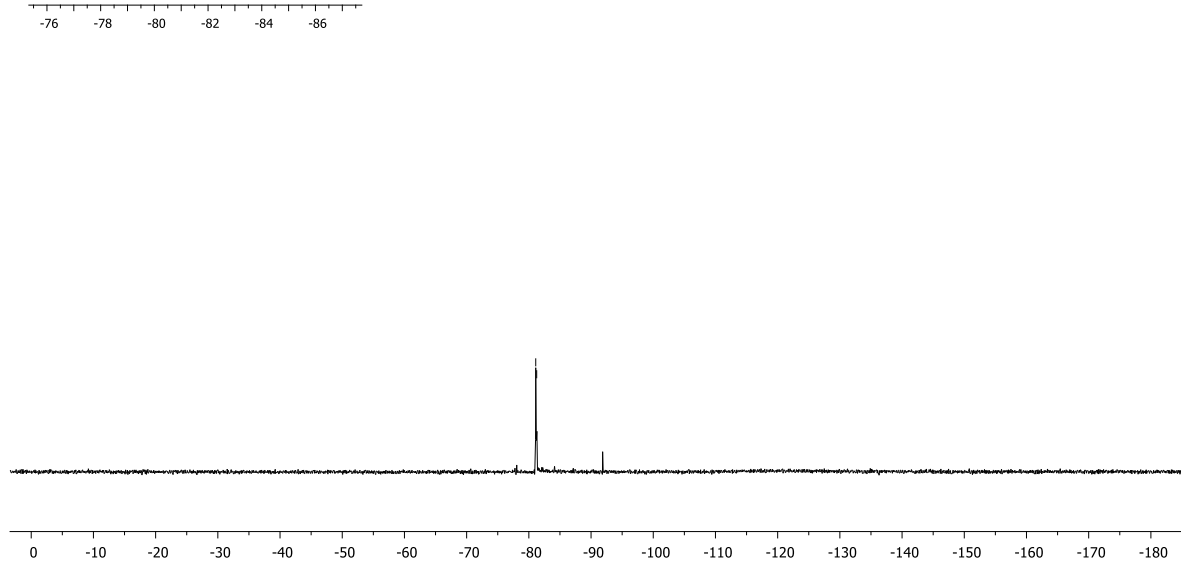



$^{13}\text{C}\{^1\text{H}\}$  NMR (151 MHz,  $\text{CDCl}_3$ )

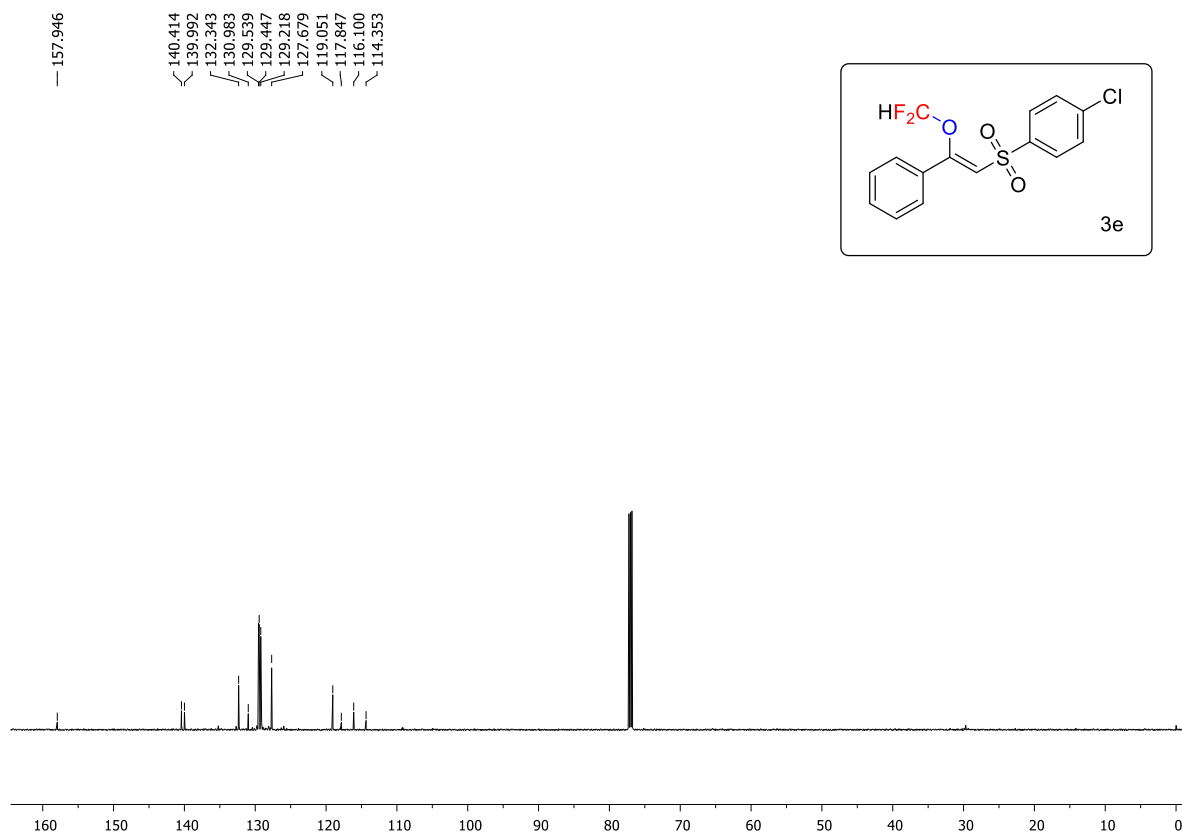

$^1\text{H}$  NMR (500 MHz,  $\text{CDCl}_3$ )

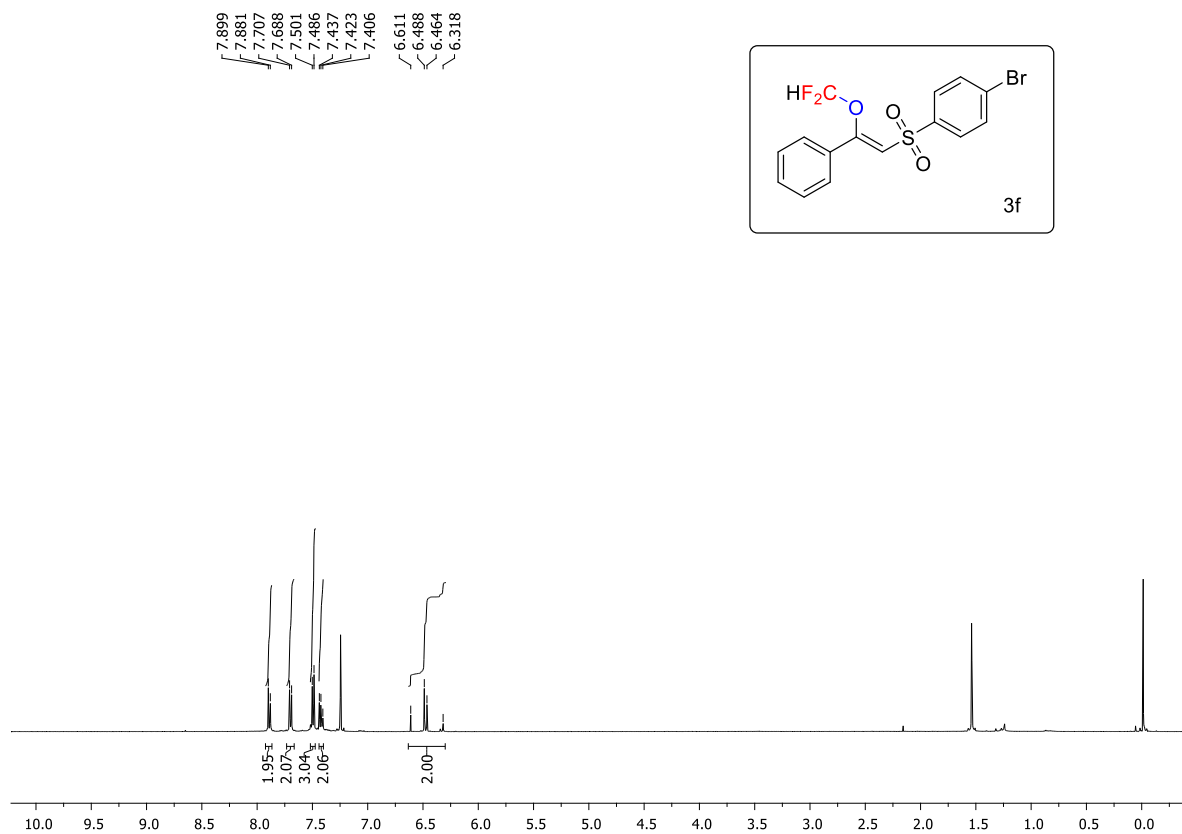

### $^{19}\text{F}$ NMR (471 MHz, $\text{CDCl}_3$ )

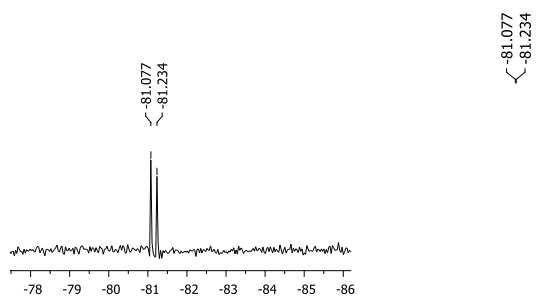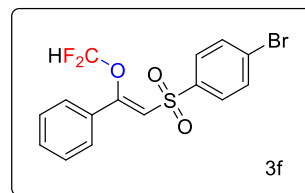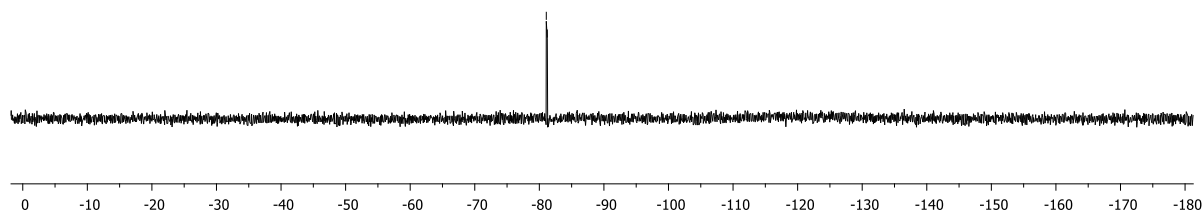

### $^{13}\text{C}\{^1\text{H}\}$ NMR (151 MHz, $\text{CDCl}_3$ )

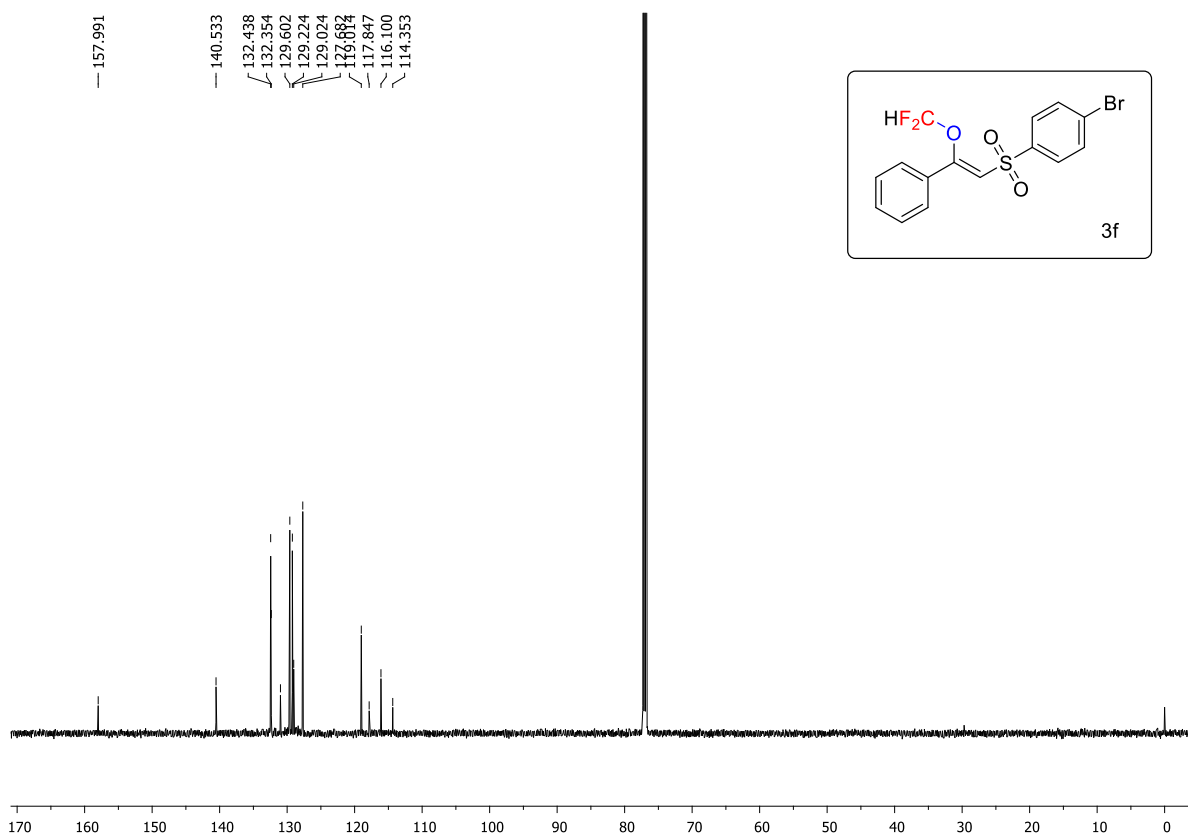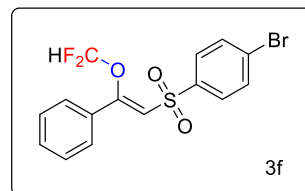

### $^1\text{H}$ NMR (500 MHz, $\text{CDCl}_3$ )

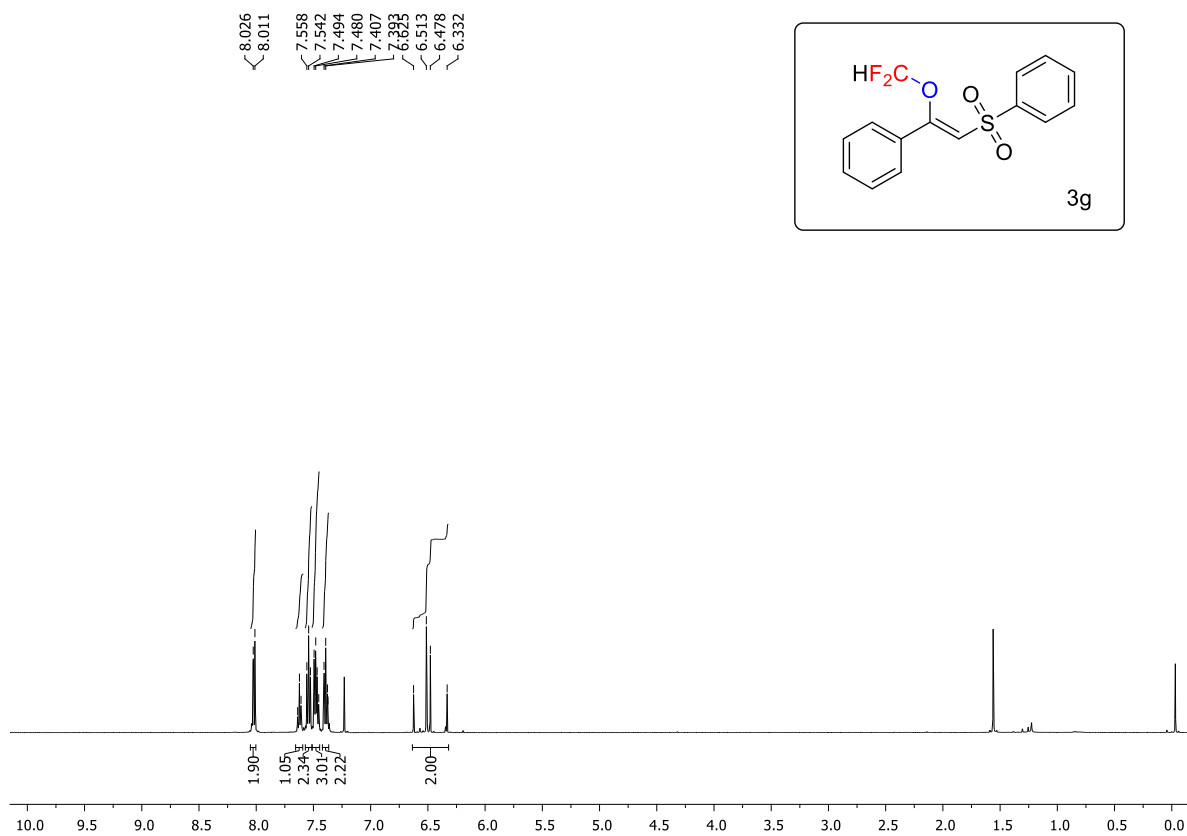

### $^{19}\text{F}$ NMR (471 MHz, $\text{CDCl}_3$ )

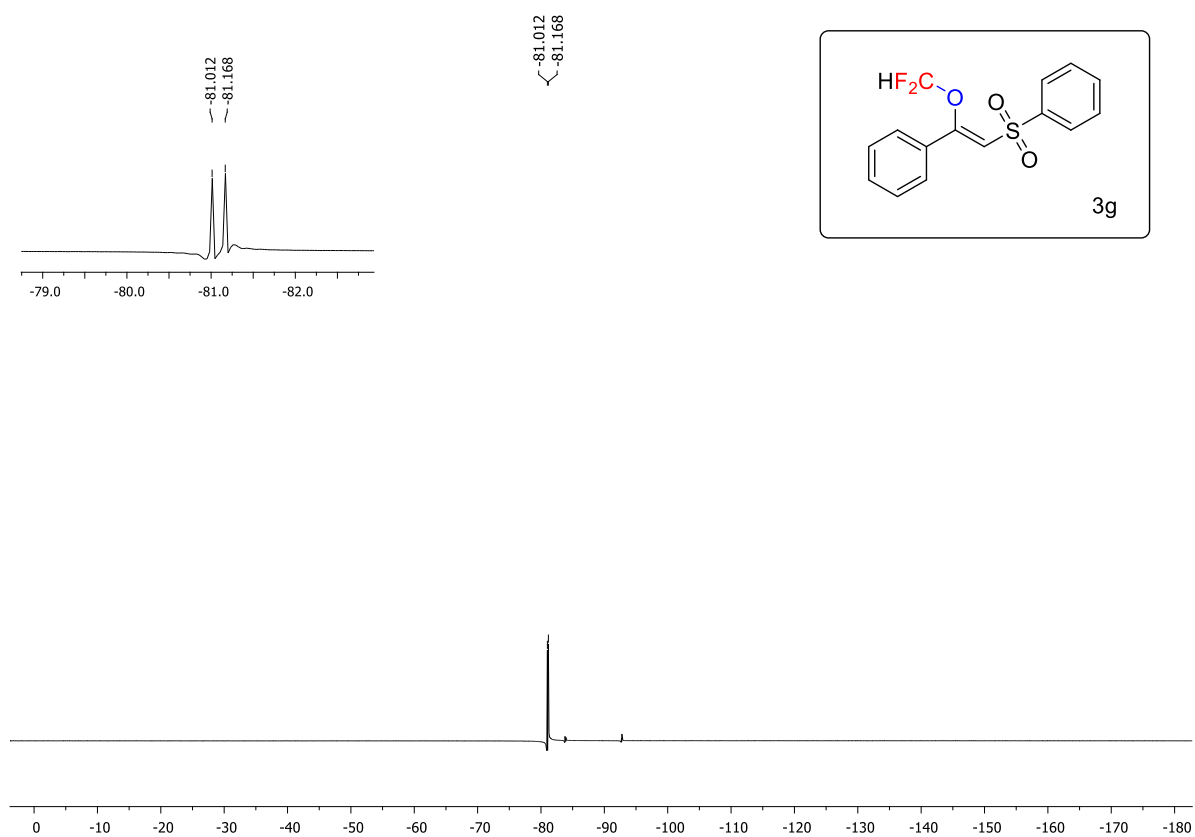

$^{13}\text{C}\{^1\text{H}\}$  NMR (151 MHz,  $\text{CDCl}_3$ )

— 157.439  
— 141.499  
/ 133.694  
/ 132.159  
/ 131.312  
— 129.133  
— 127.991  
— 127.617  
/ 119.413  
/ 117.966  
— 116.219  
— 114.472

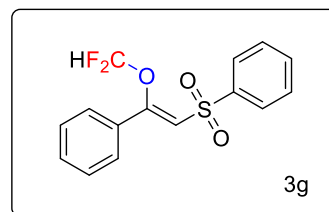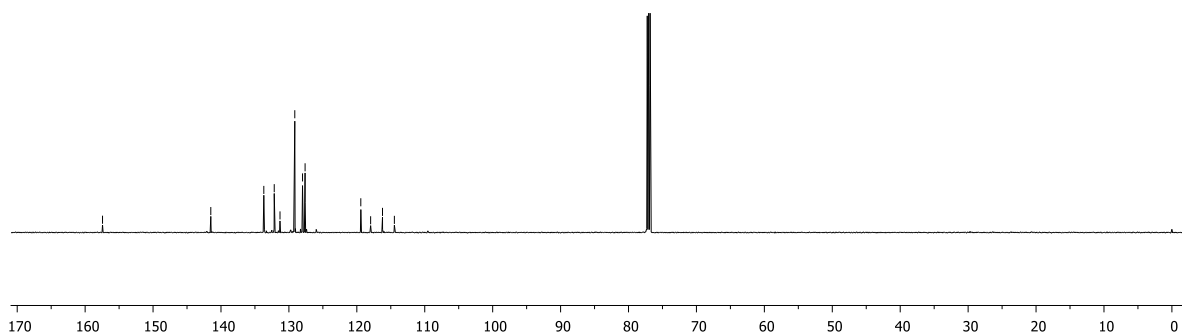

$^1\text{H}$  NMR (500 MHz,  $\text{CDCl}_3$ )

< 8.028  
< 8.013  
— 7.645  
— 7.561  
— 7.530  
— 7.115  
/ 6.986  
/ 6.887  
— 6.533  
— 6.526  
— 6.386

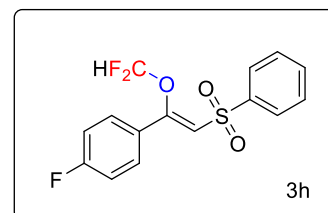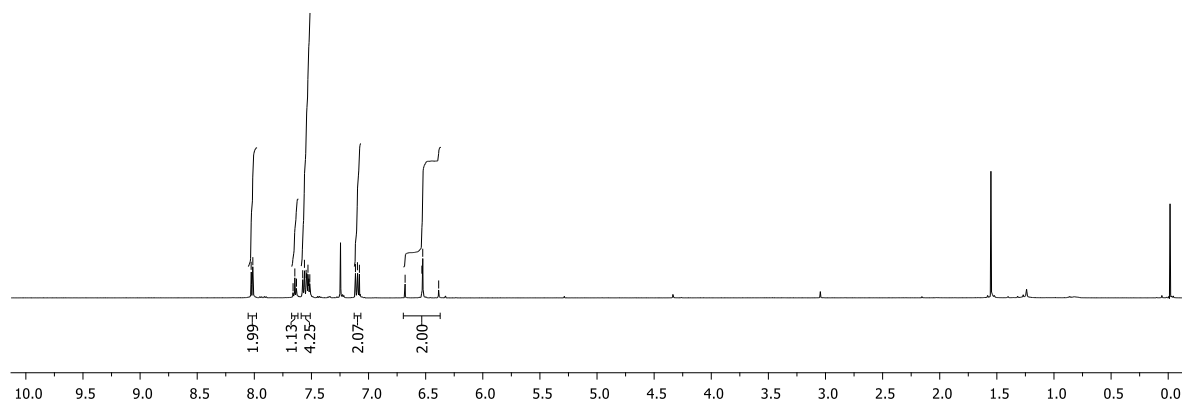

**$^{19}\text{F}$  NMR (471 MHz,  $\text{CDCl}_3$ )**

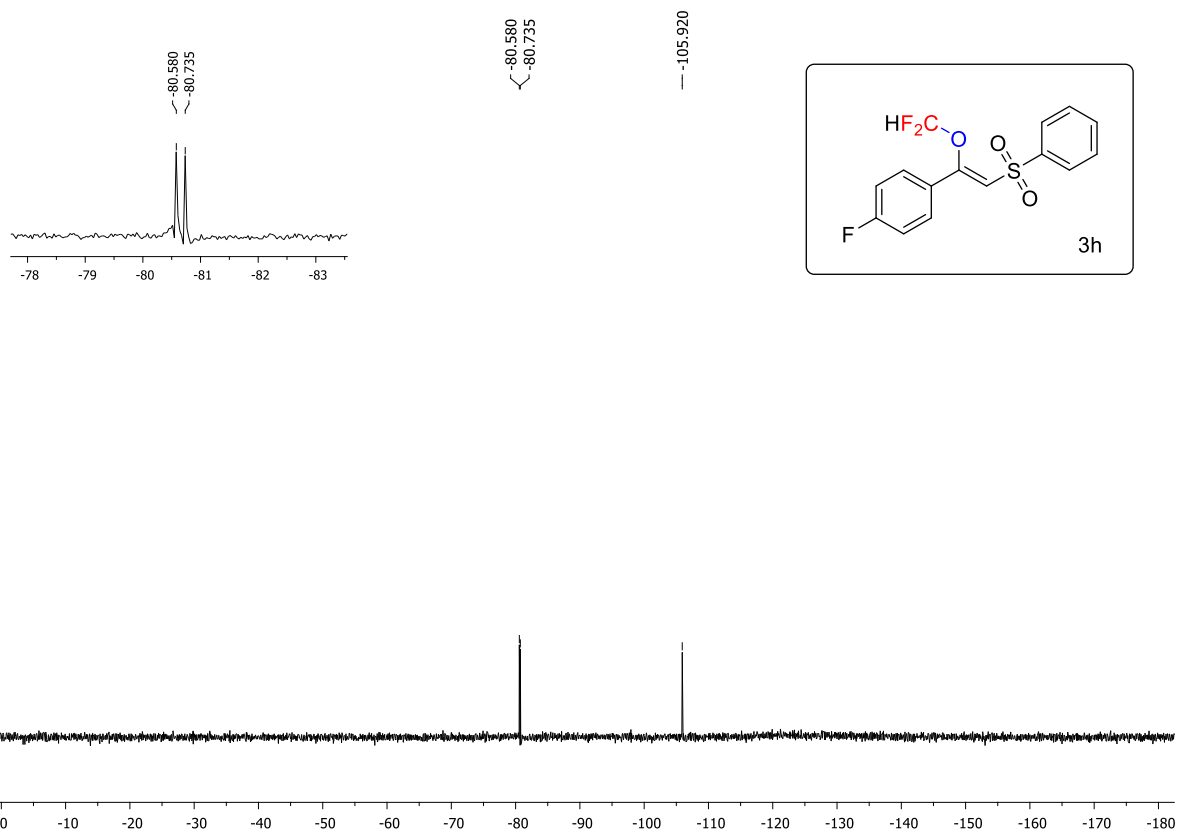

**$^{13}\text{C}\{^1\text{H}\}$  NMR (151 MHz,  $\text{CDCl}_3$ )**

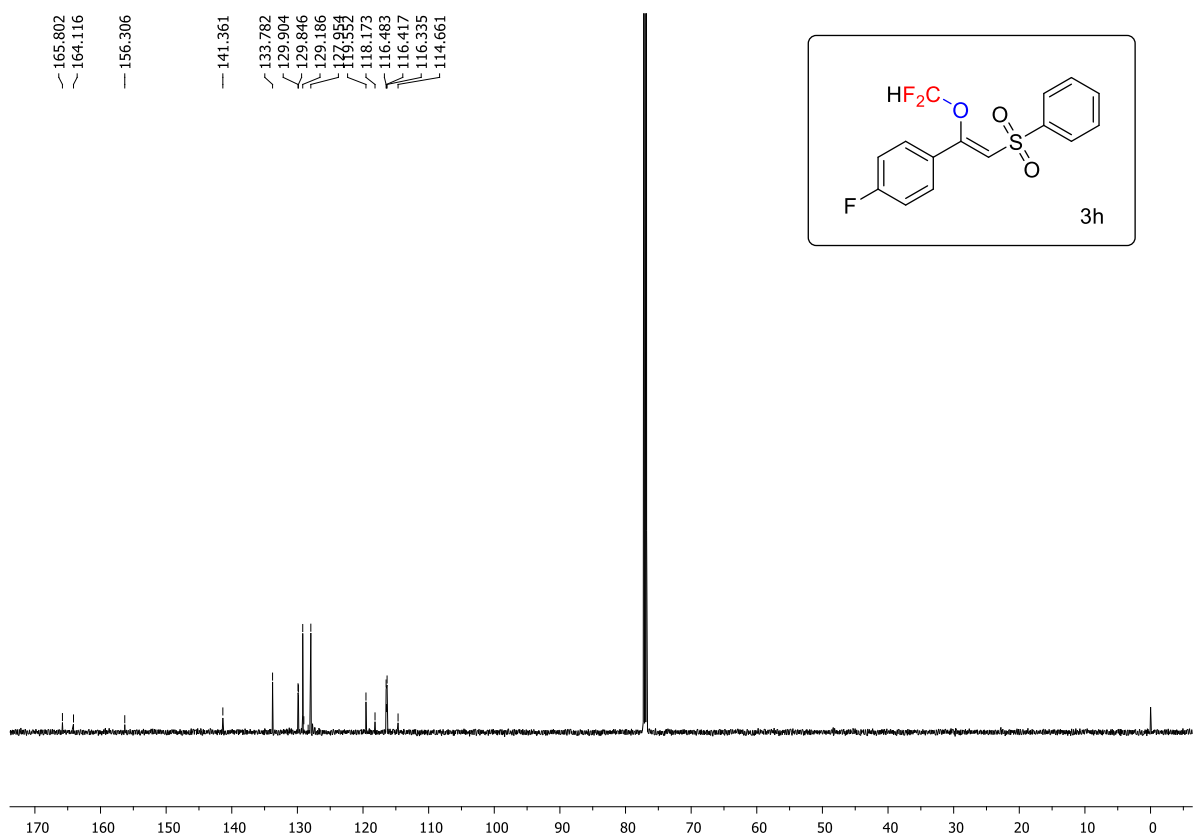

# <sup>1</sup>H NMR (500 MHz, CDCl<sub>3</sub>)

8.023  
8.007  
7.646  
7.576  
7.560  
7.545  
7.467  
7.385  
6.569  
6.539  
6.392

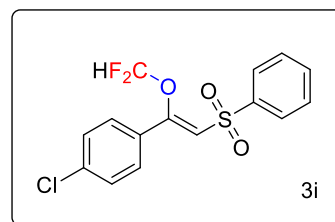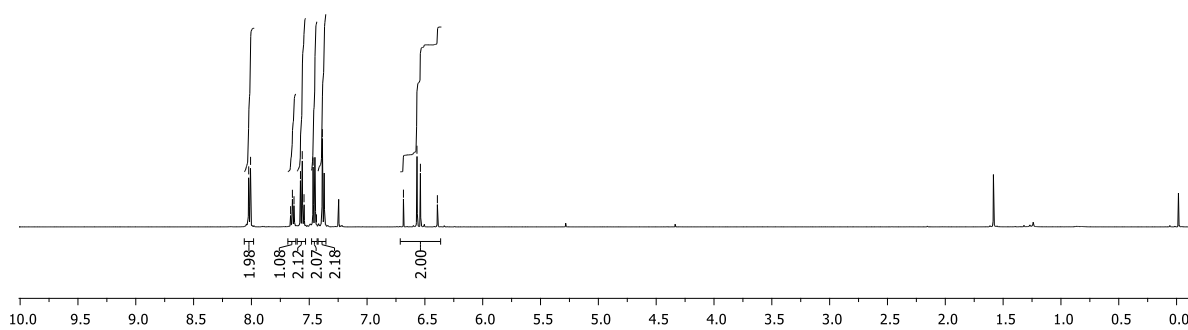

# <sup>19</sup>F NMR (471 MHz, CDCl<sub>3</sub>)

-80.514  
-80.670

-80.514  
-80.670

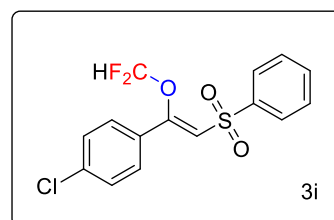

-78  
-79  
-80  
-81  
-82  
-83  
-84

0  
-10  
-20  
-30  
-40  
-50  
-60  
-70  
-80  
-90  
-100  
-110  
-120  
-130  
-140  
-150  
-160  
-170  
-180

$^{13}\text{C}\{^1\text{H}\}$  NMR (151 MHz,  $\text{CDCl}_3$ )

— 156.143  
/ 141.260  
/ 138.573  
/ 133.858  
/ 130.036  
/ 129.420  
/ 128.218  
/ 127.974  
/ 120.106  
/ 118.178  
/ 116.422  
/ 114.666

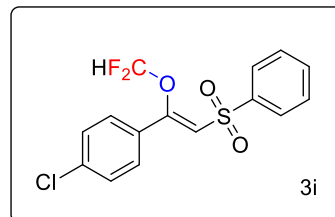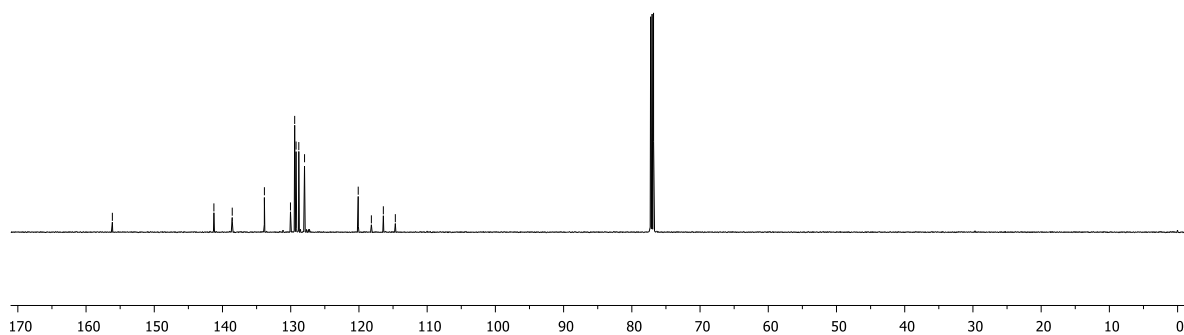

$^1\text{H}$  NMR (500 MHz,  $\text{CDCl}_3$ )

8.039  
8.024  
7.680  
7.664  
7.650  
7.594  
7.578  
7.570  
7.564  
7.552  
7.408  
7.390  
6.699  
6.590  
6.552  
6.405

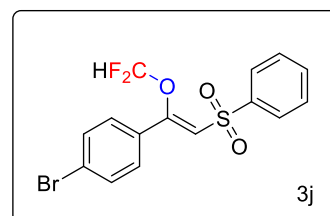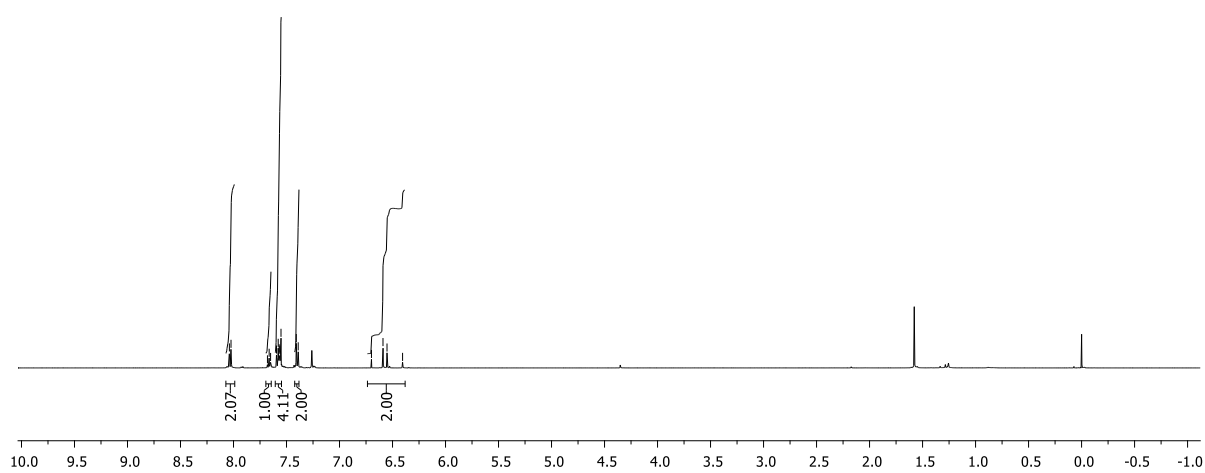

**$^{19}\text{F}$  NMR (471 MHz,  $\text{CDCl}_3$ )**

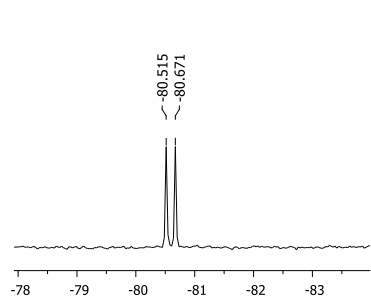

-80.515  
-80.671

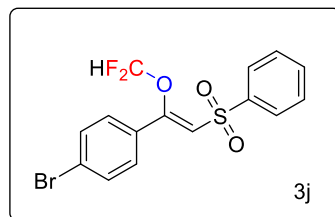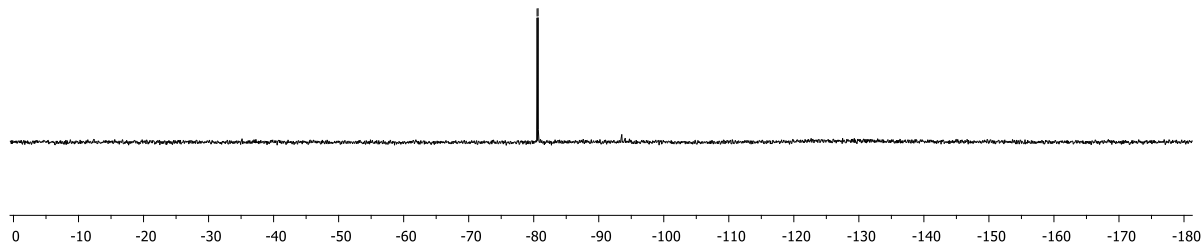

**$^{13}\text{C}\{^1\text{H}\}$  NMR (151 MHz,  $\text{CDCl}_3$ )**

-156.199  
-141.232  
-133.863  
-132.397  
-129.223  
-128.928  
-127.977  
-126.930  
-118.168  
-116.412  
-114.656

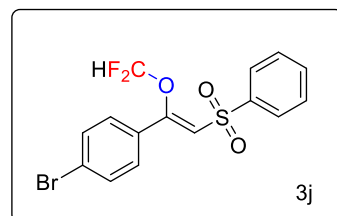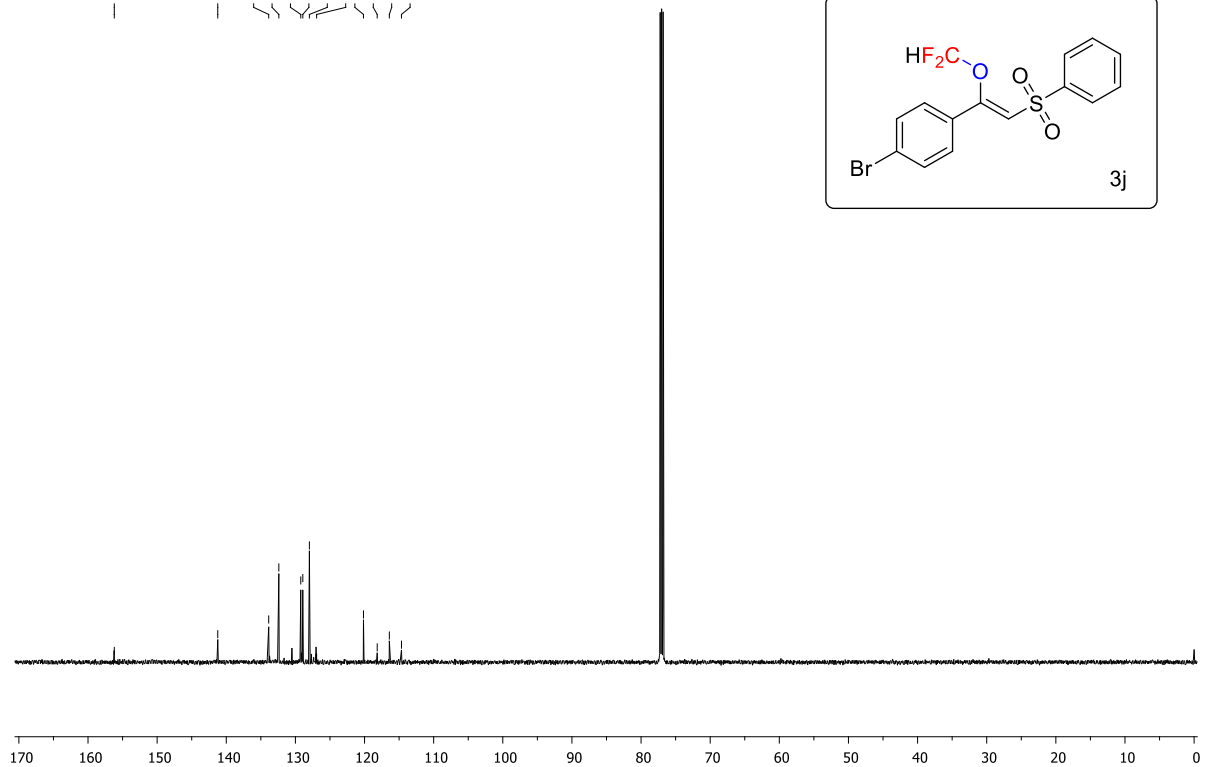



# <sup>1</sup>H NMR (500 MHz, CDCl<sub>3</sub>)

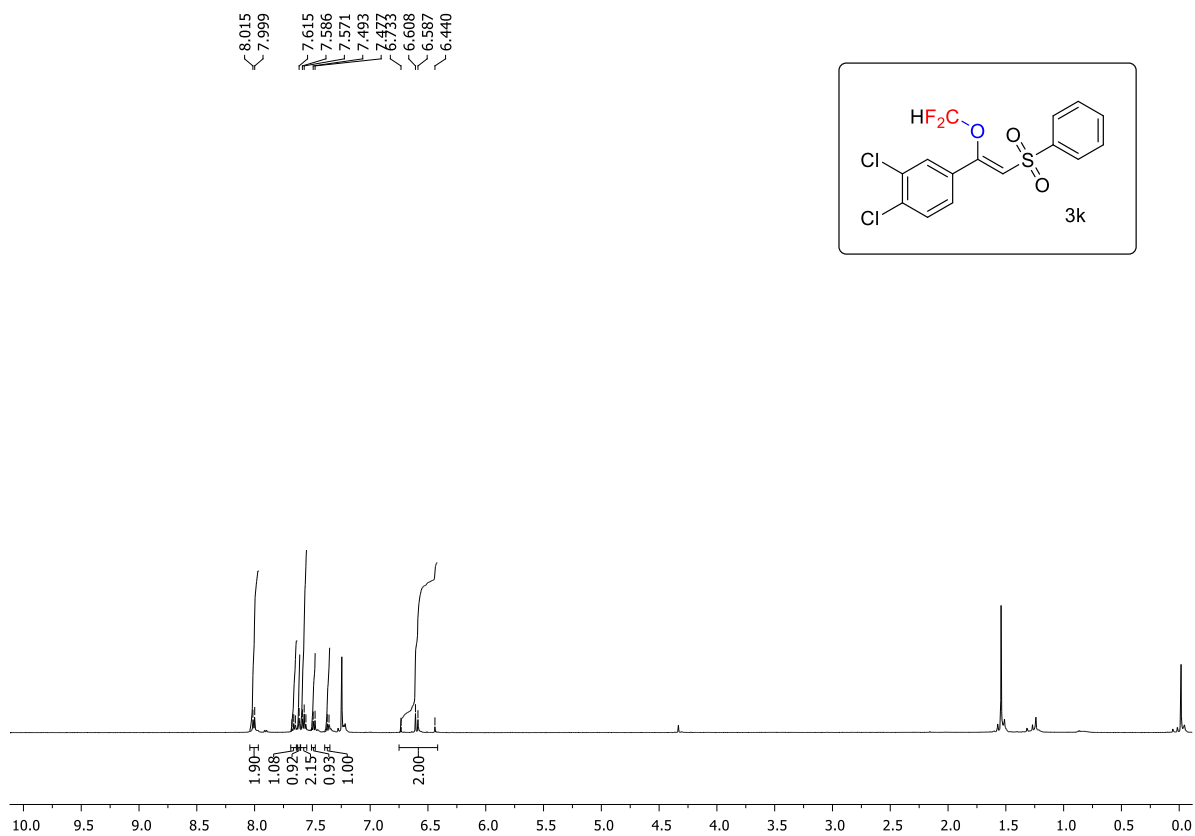

# <sup>19</sup>F NMR (471 MHz, CDCl<sub>3</sub>)

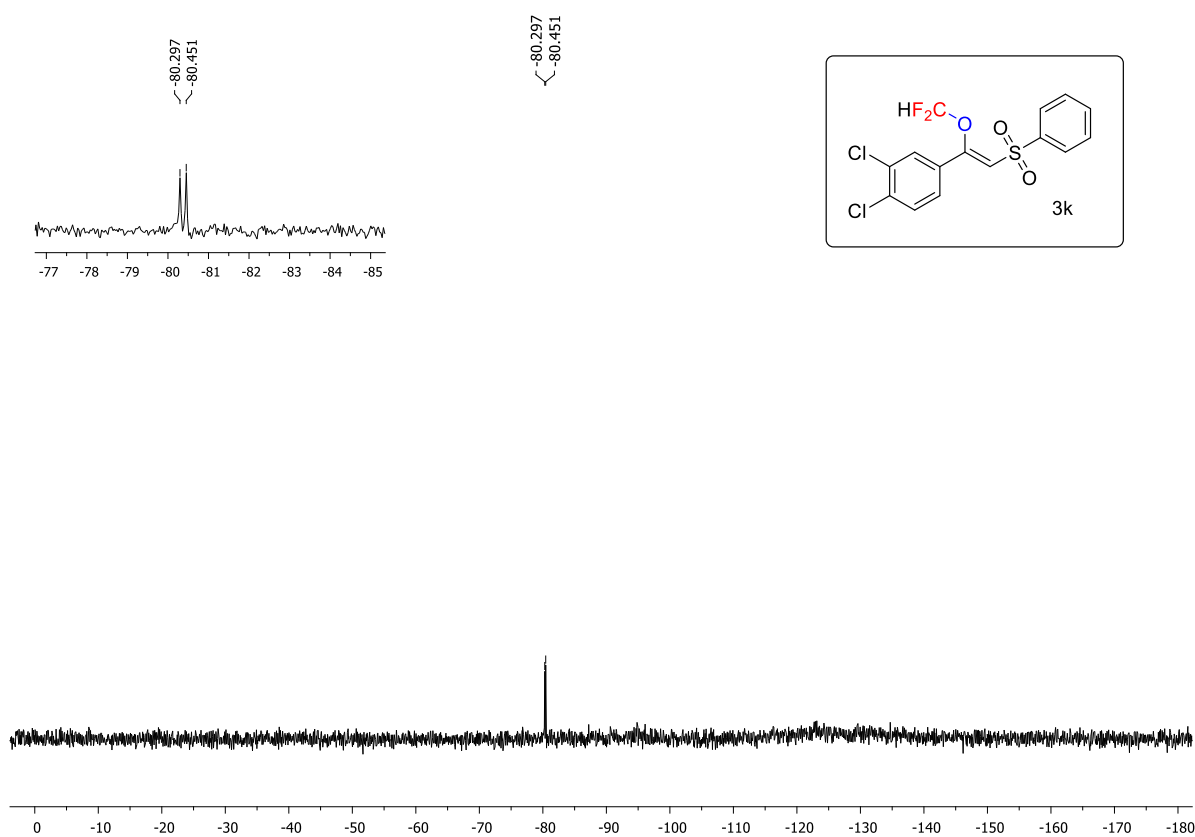

$^{13}\text{C}\{^1\text{H}\}$  NMR (151 MHz,  $\text{CDCl}_3$ )

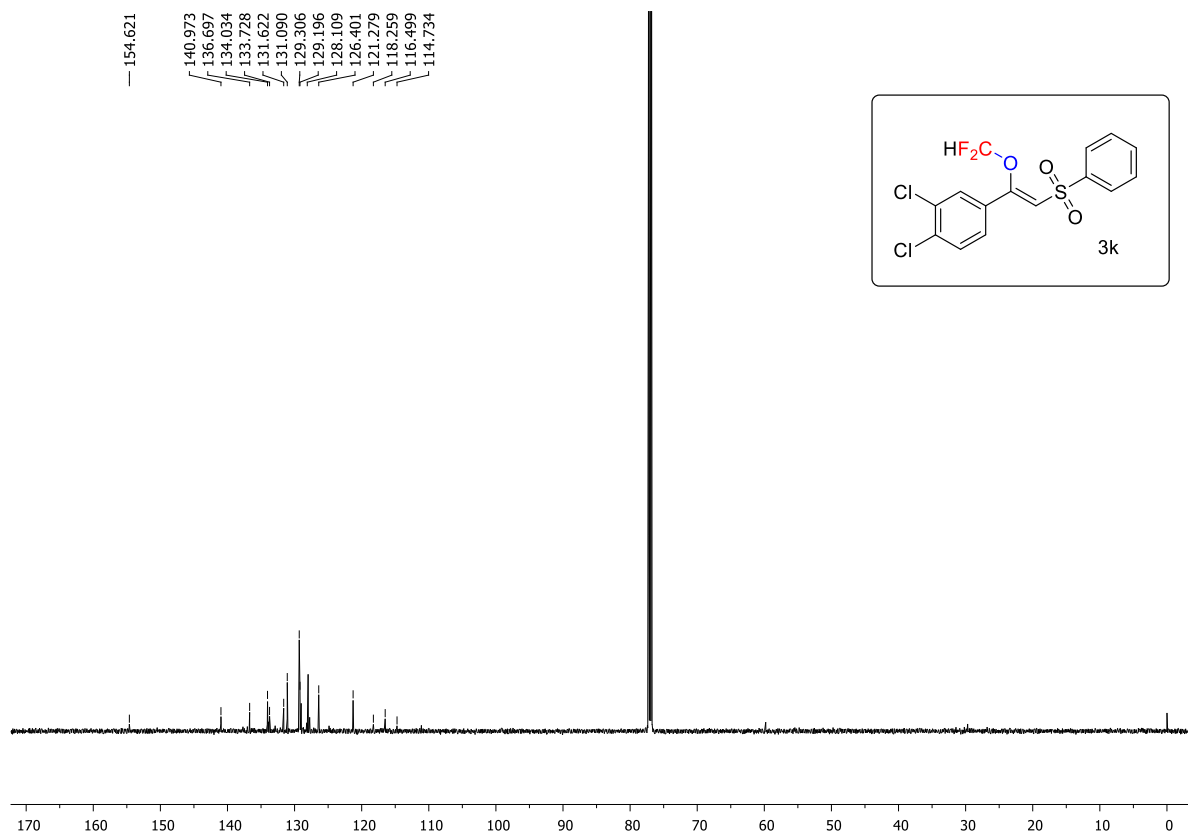

$^1\text{H}$  NMR (500 MHz,  $\text{CDCl}_3$ )

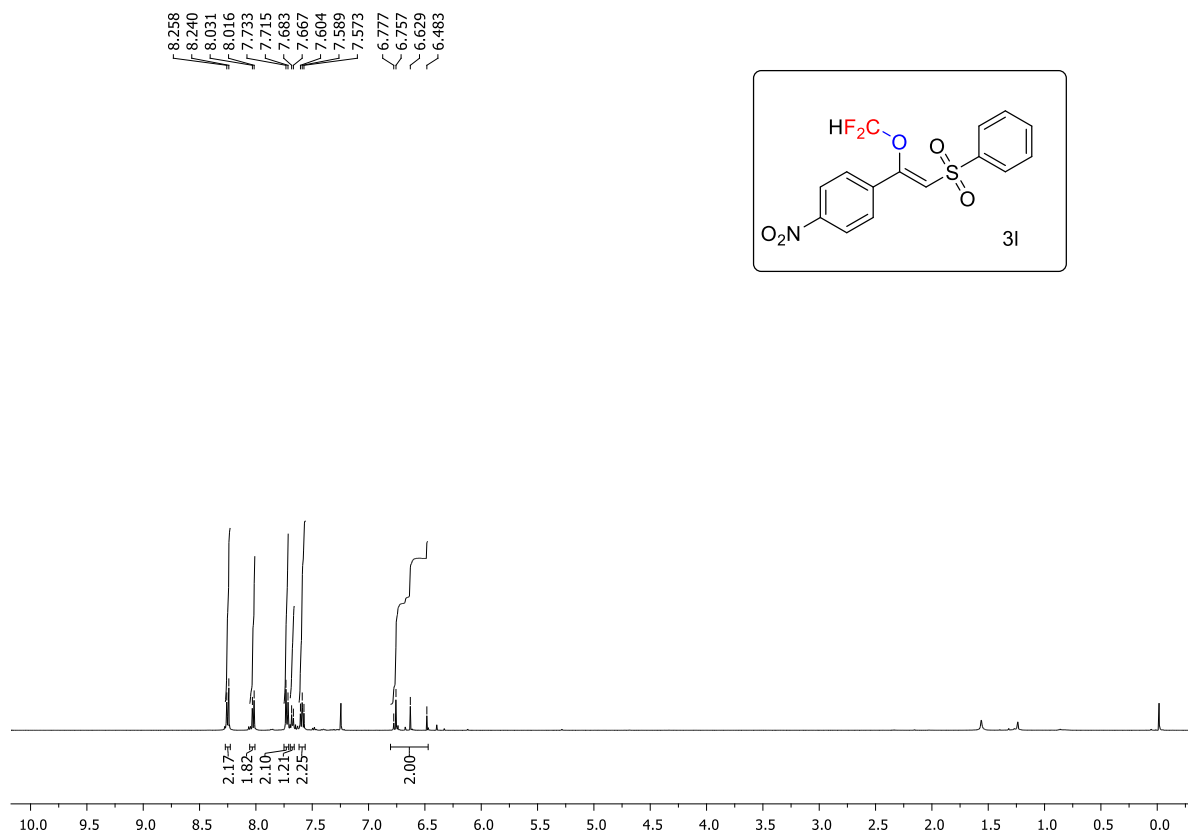

**$^{19}\text{F}$  NMR (471 MHz,  $\text{CDCl}_3$ )**

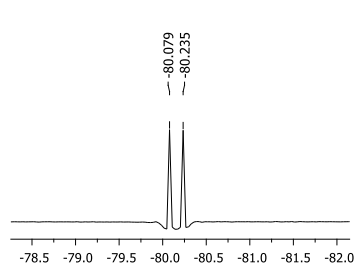

$\delta$  -80.079  
 $\delta$  -80.235

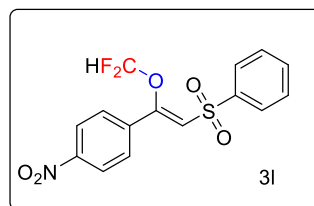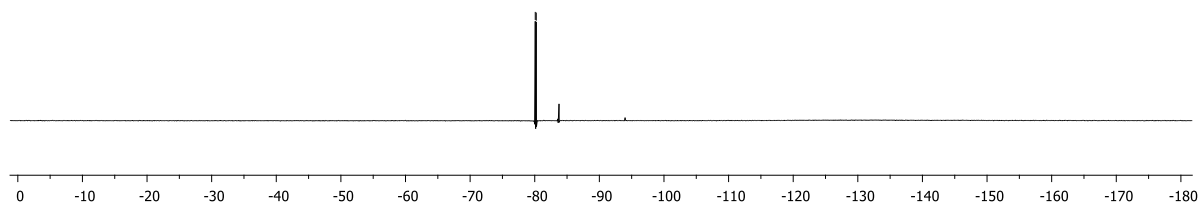

**$^{13}\text{C}\{^1\text{H}\}$  NMR (151 MHz,  $\text{CDCl}_3$ )**

149.654  
140.957  
140.681  
137.895  
134.255  
133.942  
130.889  
129.411  
128.453  
128.070  
127.386  
124.124  
123.361  
123.285  
118.296  
116.522  
114.749

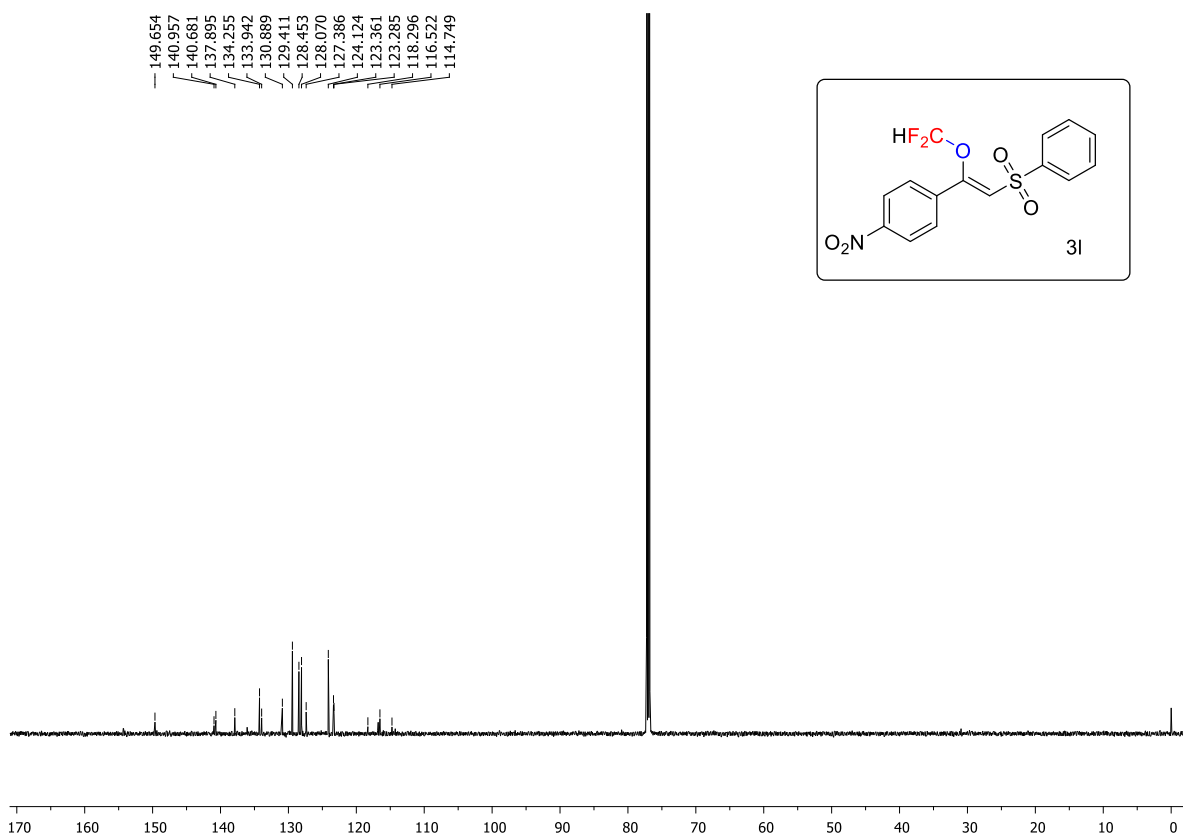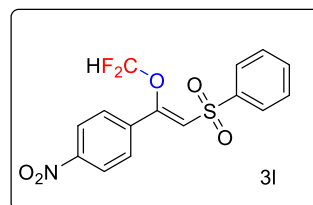

# <sup>1</sup>H NMR (500 MHz, CDCl<sub>3</sub>)

8.040  
8.023  
7.573  
7.558  
7.310  
7.078  
6.998  
6.824  
6.514  
6.477  
6.331

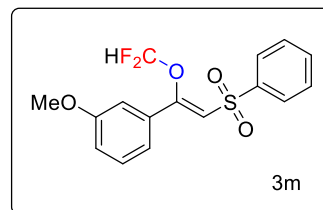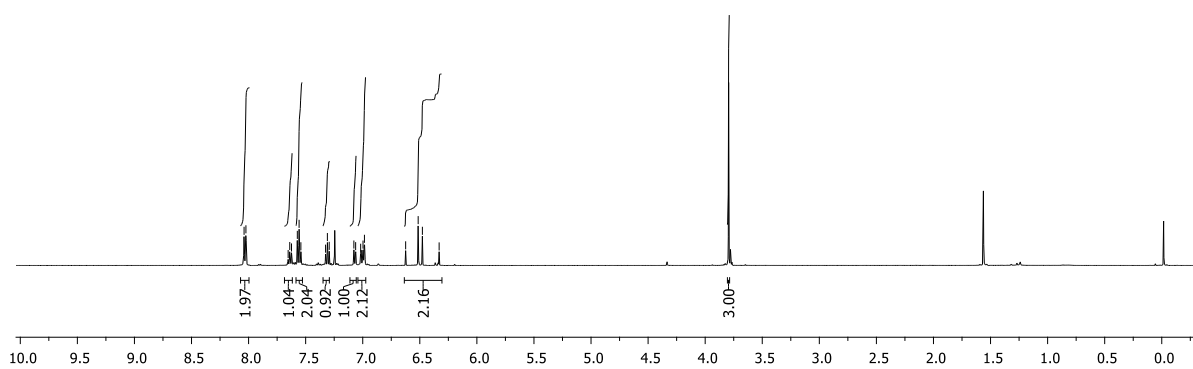

# <sup>19</sup>F NMR (471 MHz, CDCl<sub>3</sub>)

-81.105  
-81.261

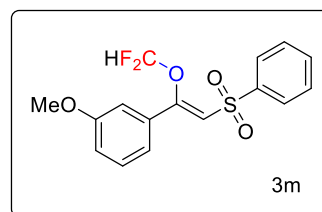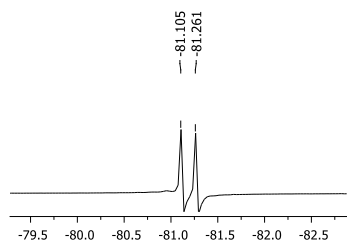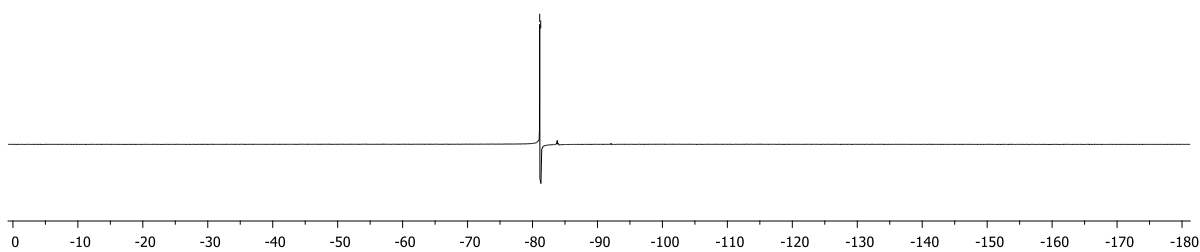

### $^{13}\text{C}\{^1\text{H}\}$ NMR (151 MHz, $\text{CDCl}_3$ )

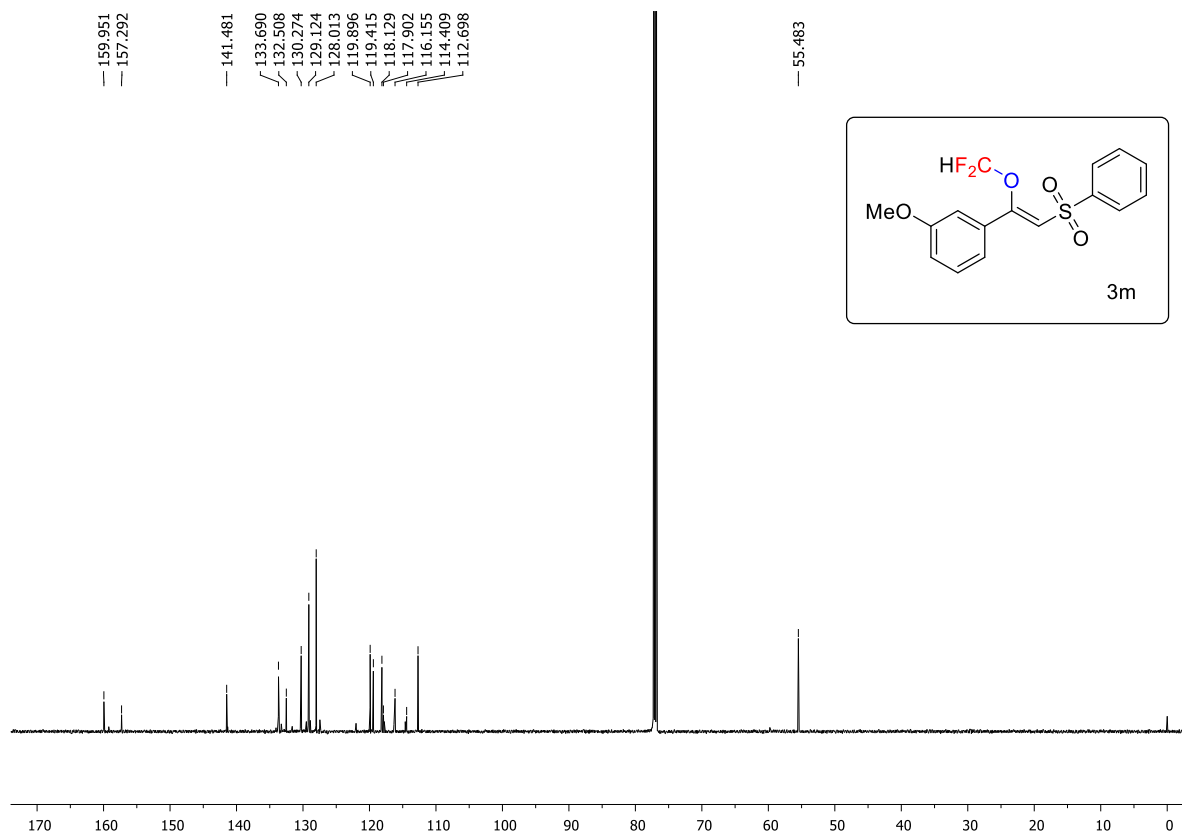

### $^1\text{H}$ NMR (500 MHz, $\text{CDCl}_3$ )

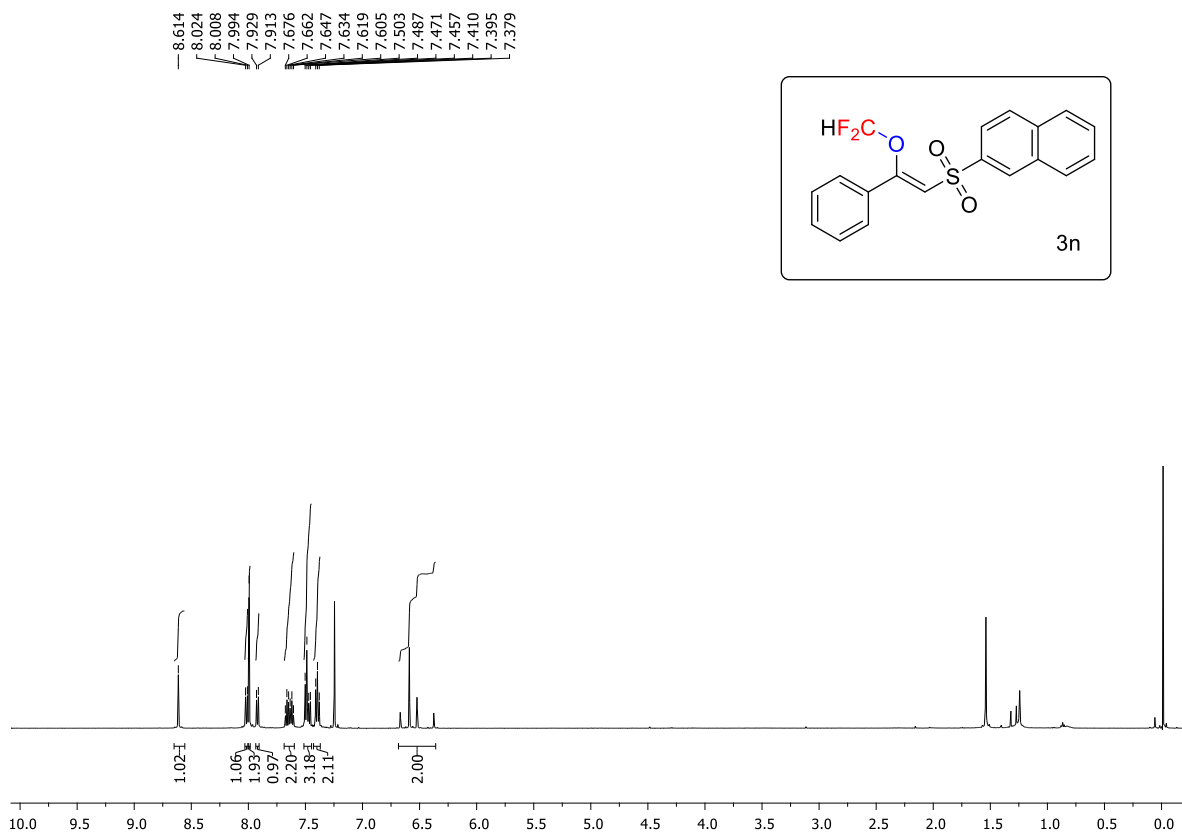

**$^{19}\text{F}$  NMR (471 MHz,  $\text{CDCl}_3$ )**

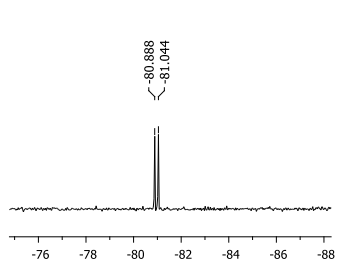

-80.888  
-81.044

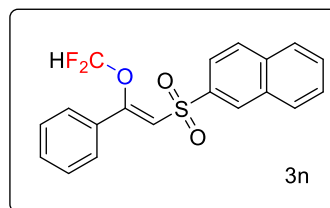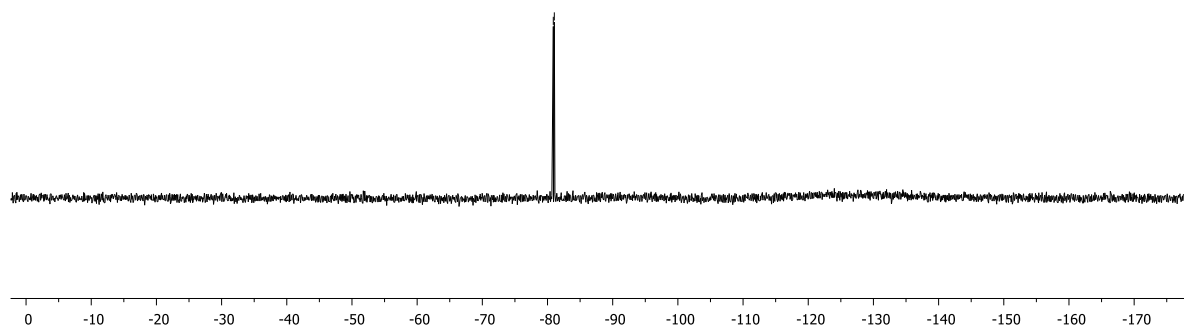

**$^{13}\text{C}\{^1\text{H}\}$  NMR (151 MHz,  $\text{CDCl}_3$ )**

157.491  
138.333  
135.382  
132.201  
132.137  
131.329  
129.830  
129.615  
129.423  
129.260  
129.112  
127.955  
127.616  
127.595  
122.778  
119.402  
118.009  
116.262  
114.515

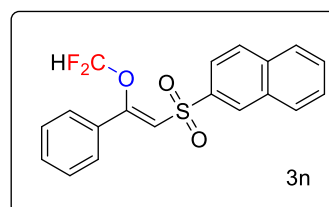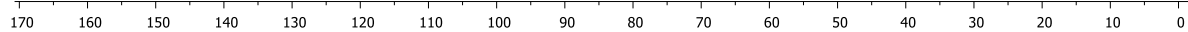

# <sup>1</sup>H NMR (500 MHz, CDCl<sub>3</sub>)

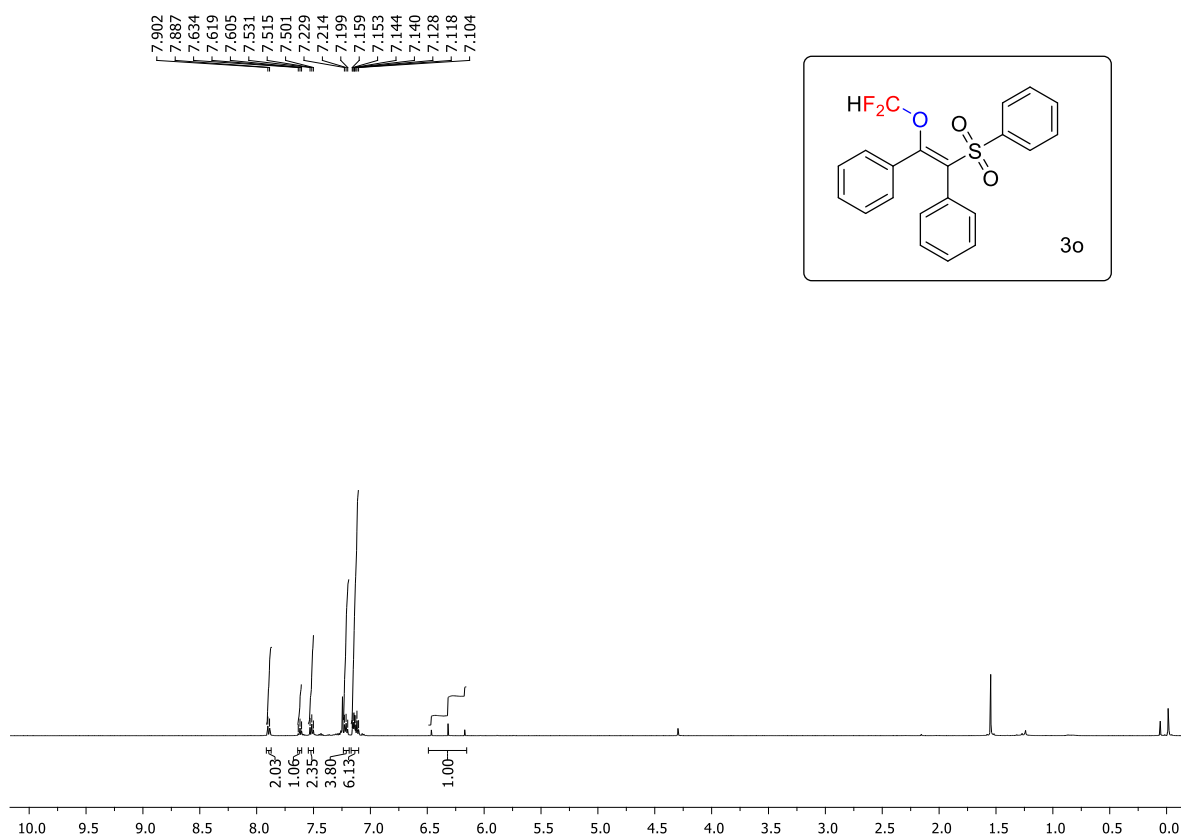

# <sup>19</sup>F NMR (471 MHz, CDCl<sub>3</sub>)

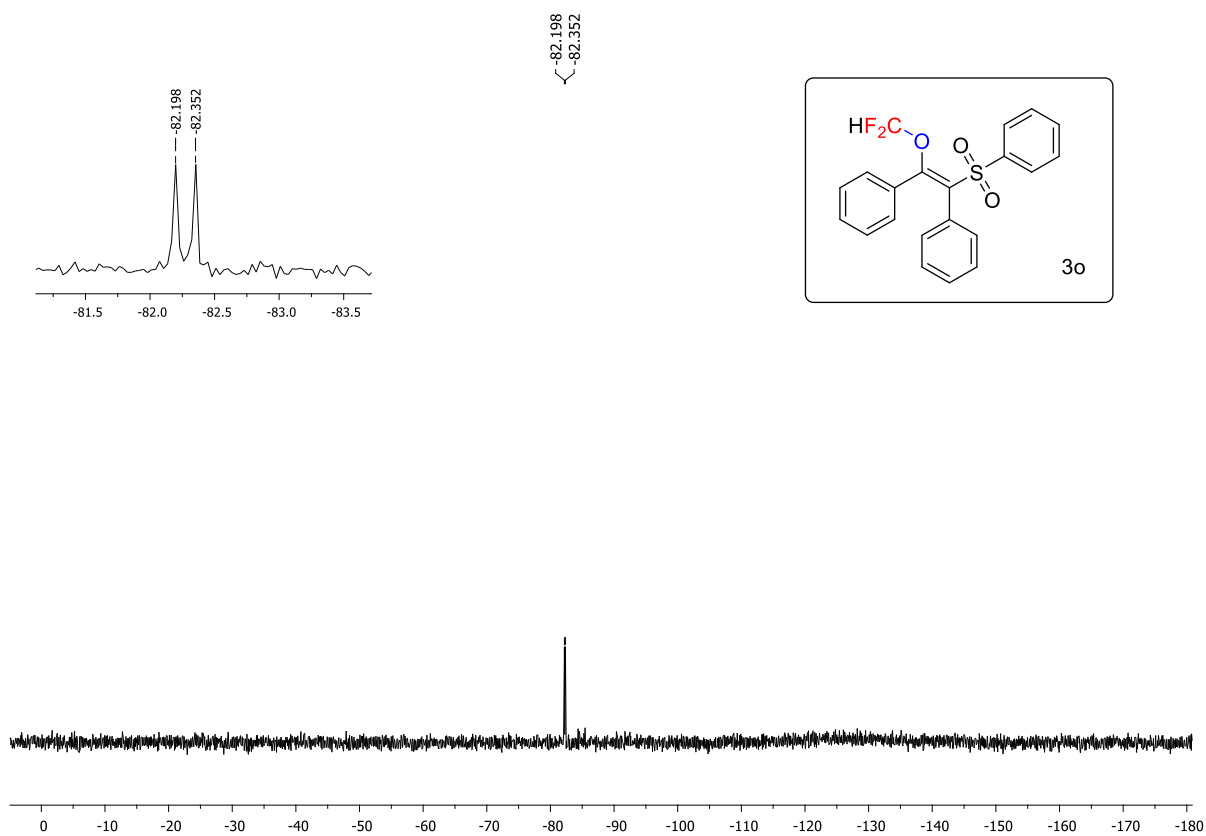

### $^{13}\text{C}\{^1\text{H}\}$ NMR (151 MHz, $\text{CDCl}_3$ )

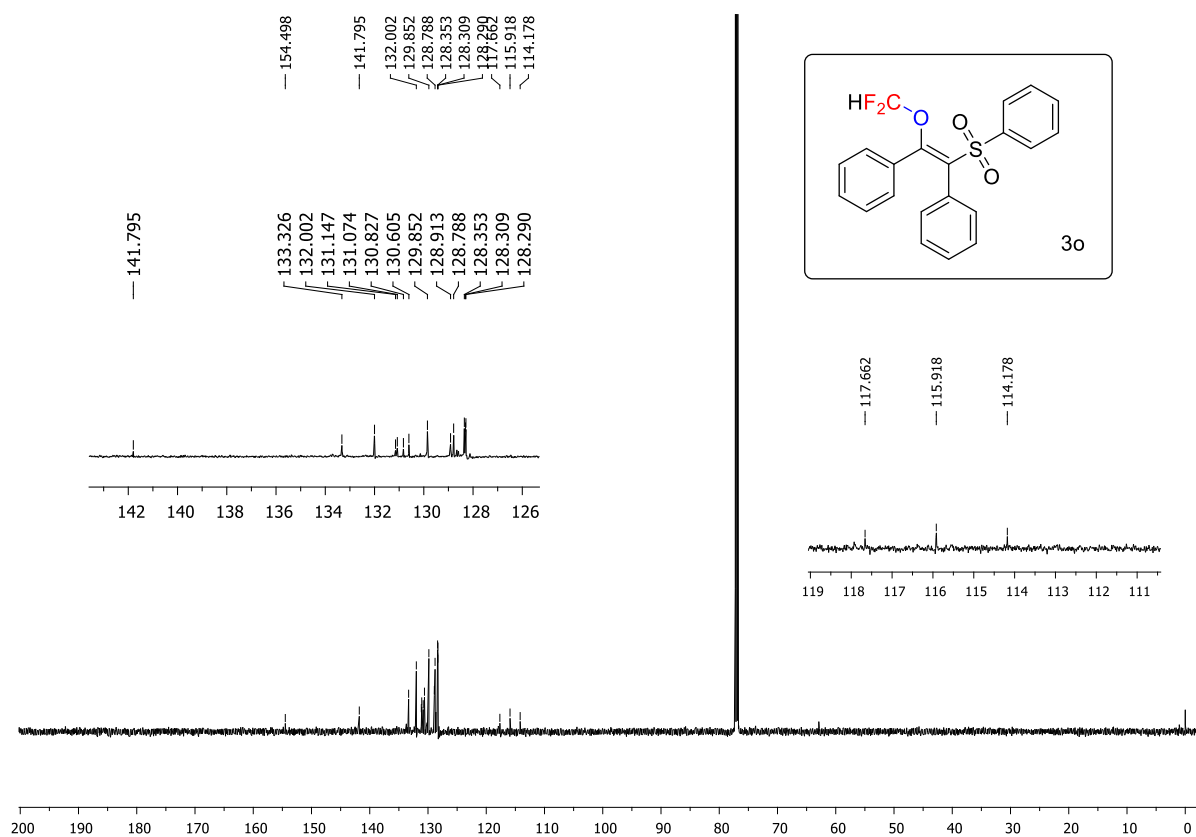

### $^1\text{H}$ NMR (500 MHz, $\text{CDCl}_3$ )

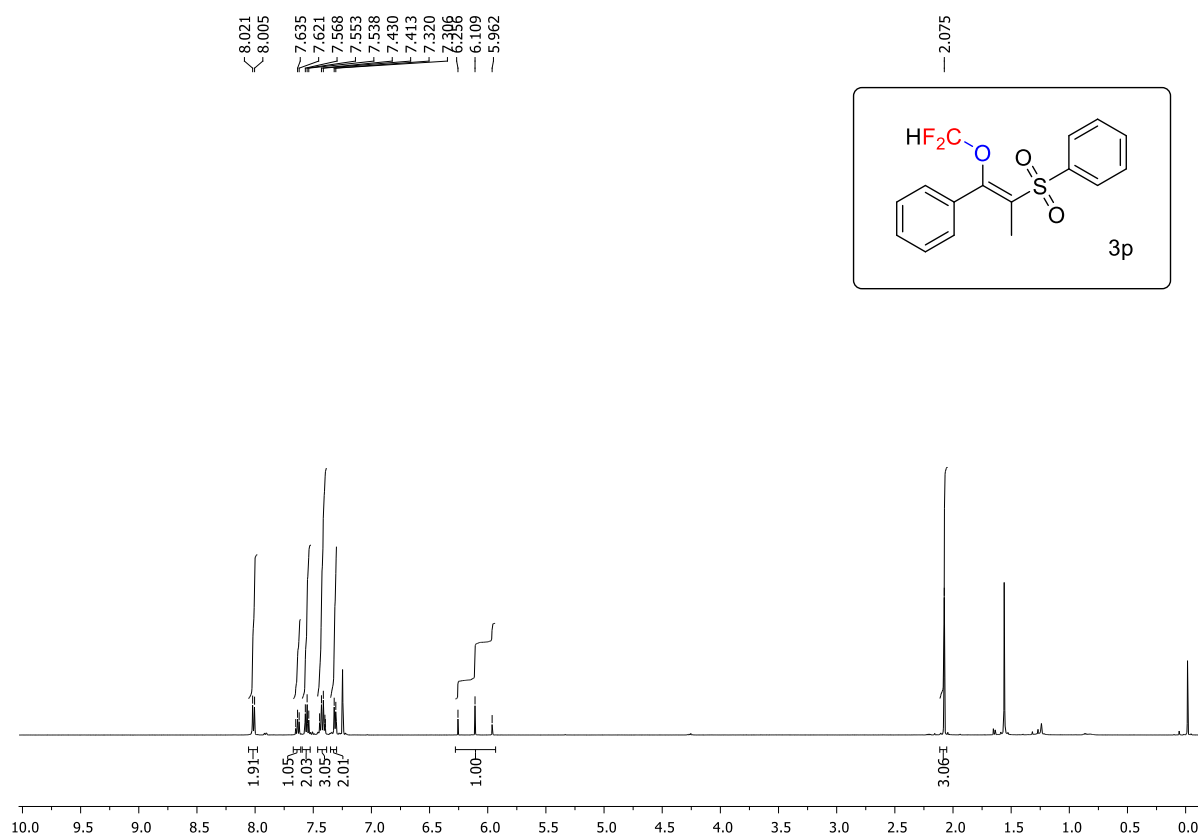



**$^{19}\text{F}$  NMR (471 MHz,  $\text{CDCl}_3$ )**

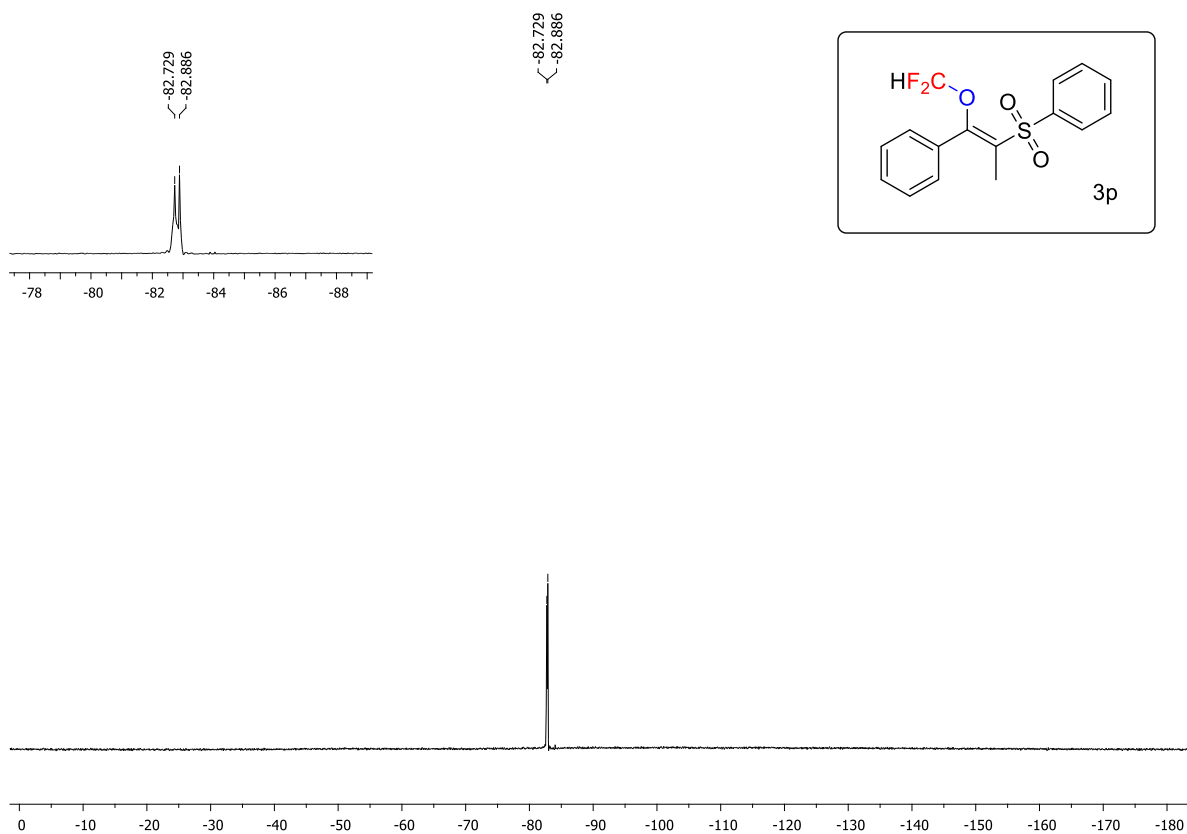

**$^{13}\text{C}\{^1\text{H}\}$  NMR (151 MHz,  $\text{CDCl}_3$ )**

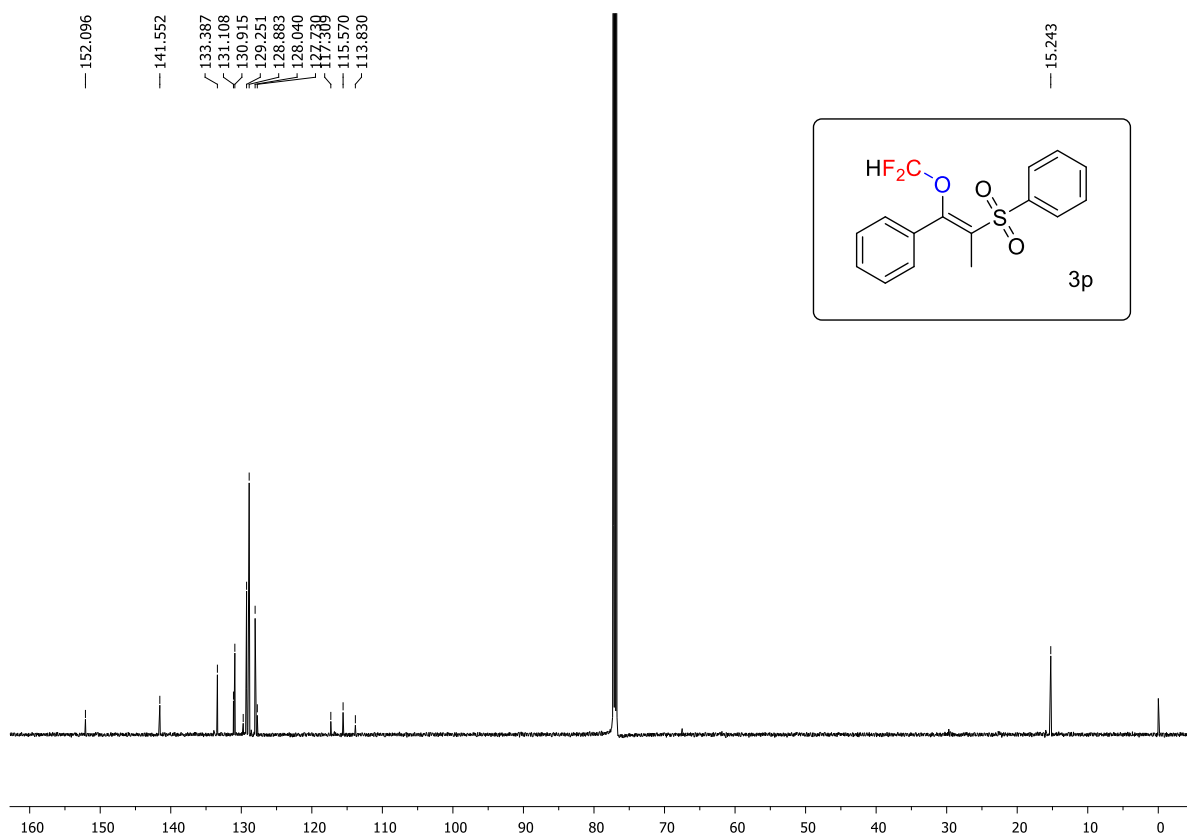

# <sup>1</sup>H NMR (500 MHz, CDCl<sub>3</sub>)

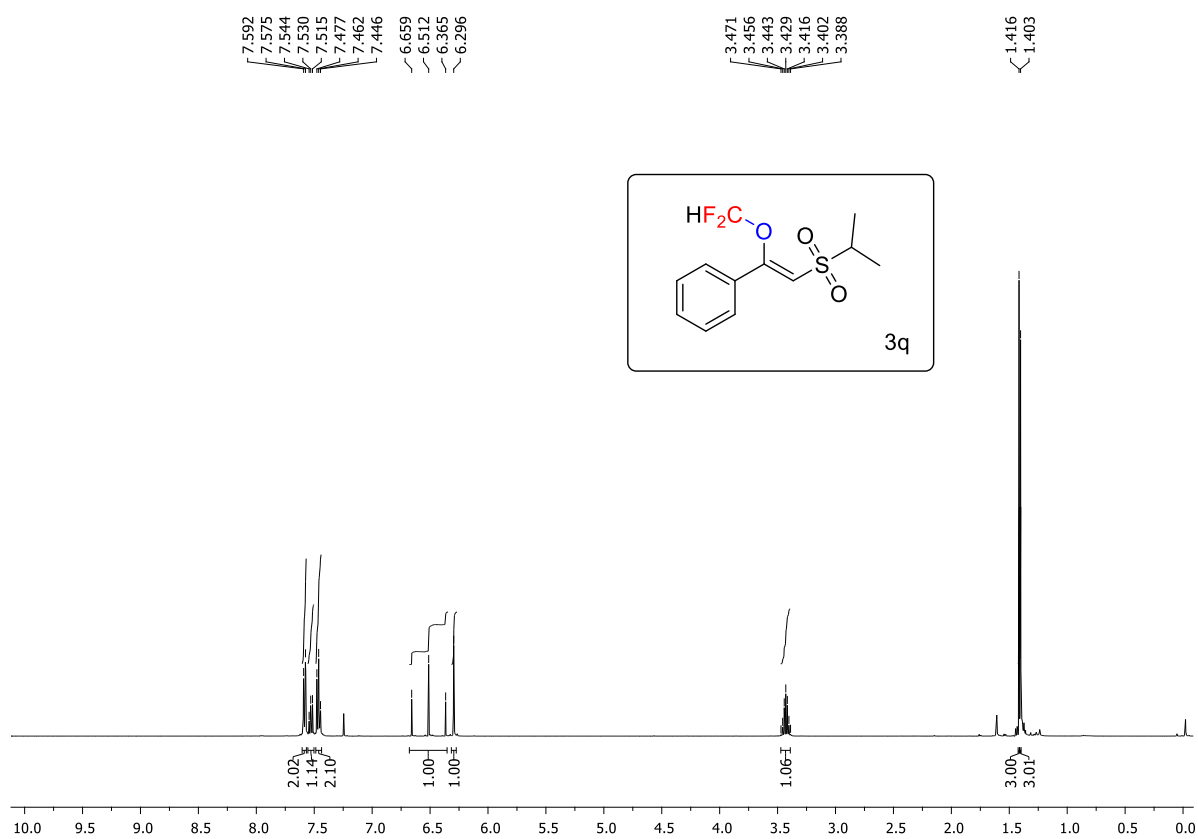

# <sup>19</sup>F NMR (471 MHz, CDCl<sub>3</sub>)

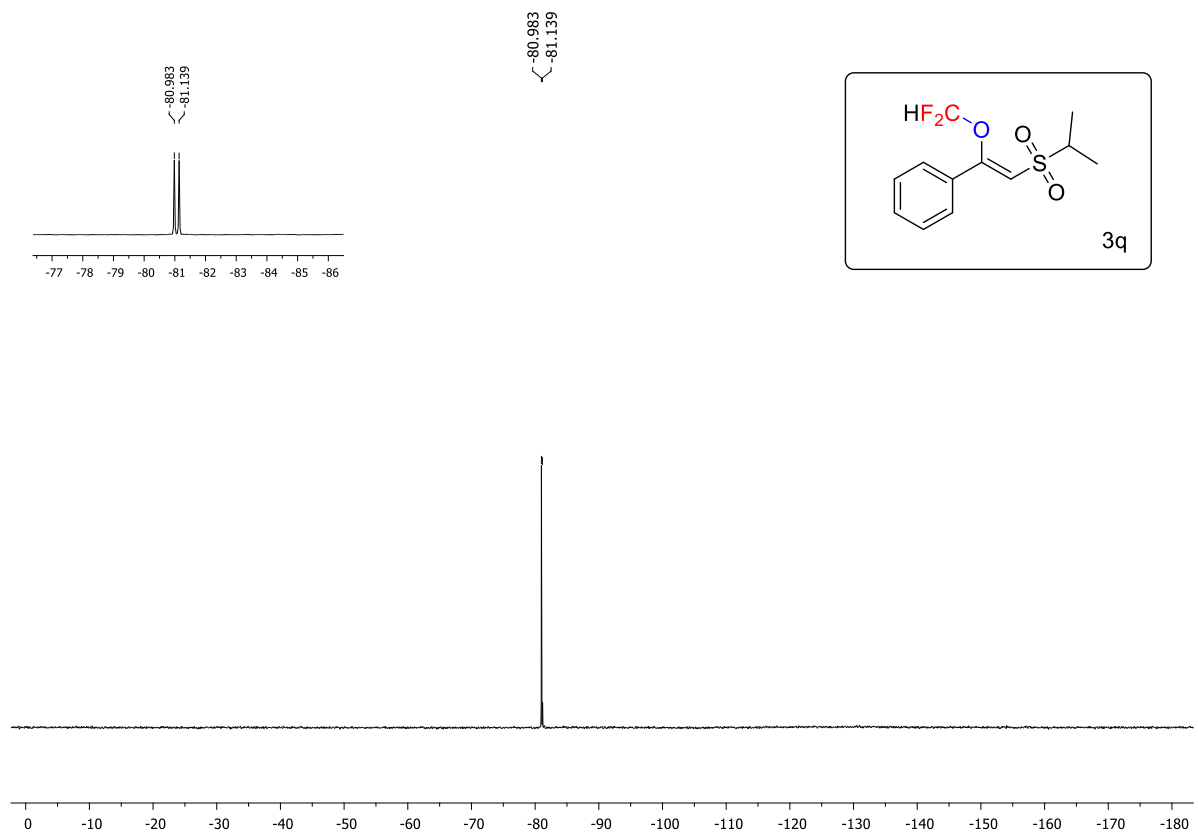

$^{13}\text{C}\{^1\text{H}\}$  NMR (151 MHz,  $\text{CDCl}_3$ )

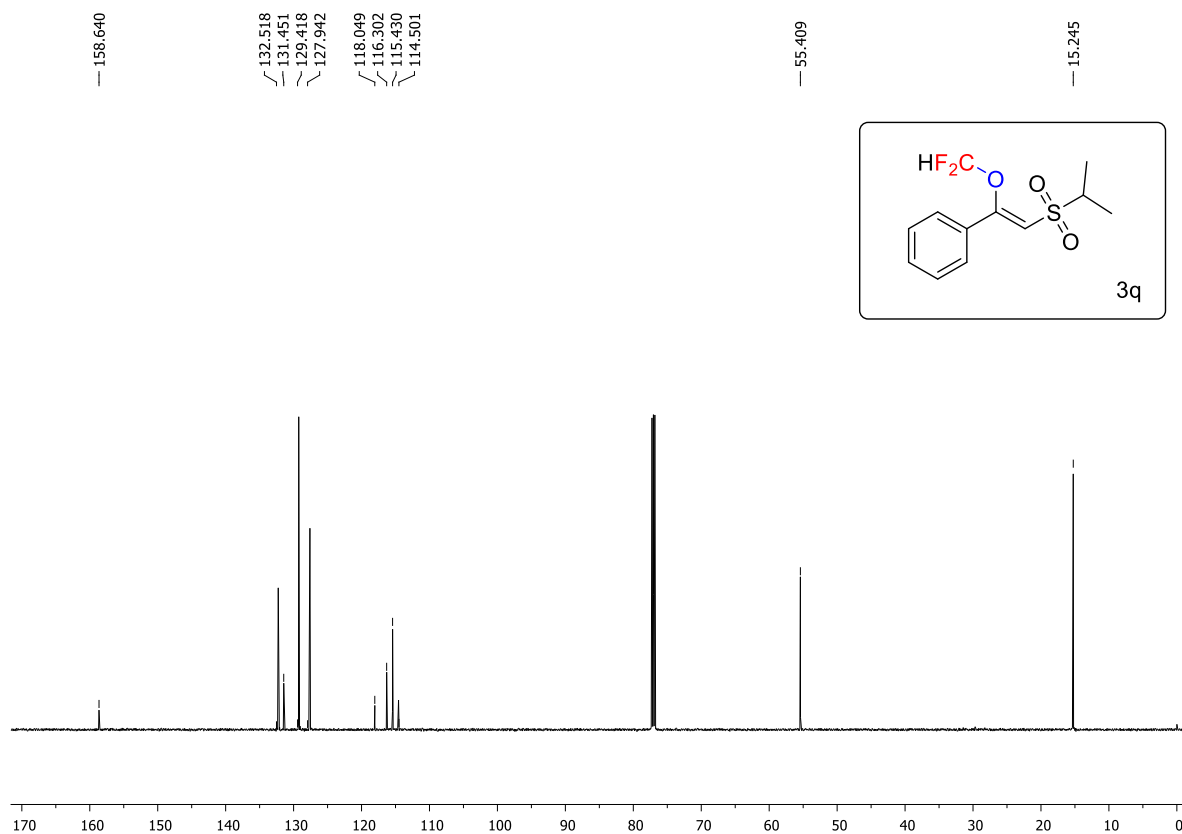

$^1\text{H}$  NMR (500 MHz,  $\text{CDCl}_3$ )

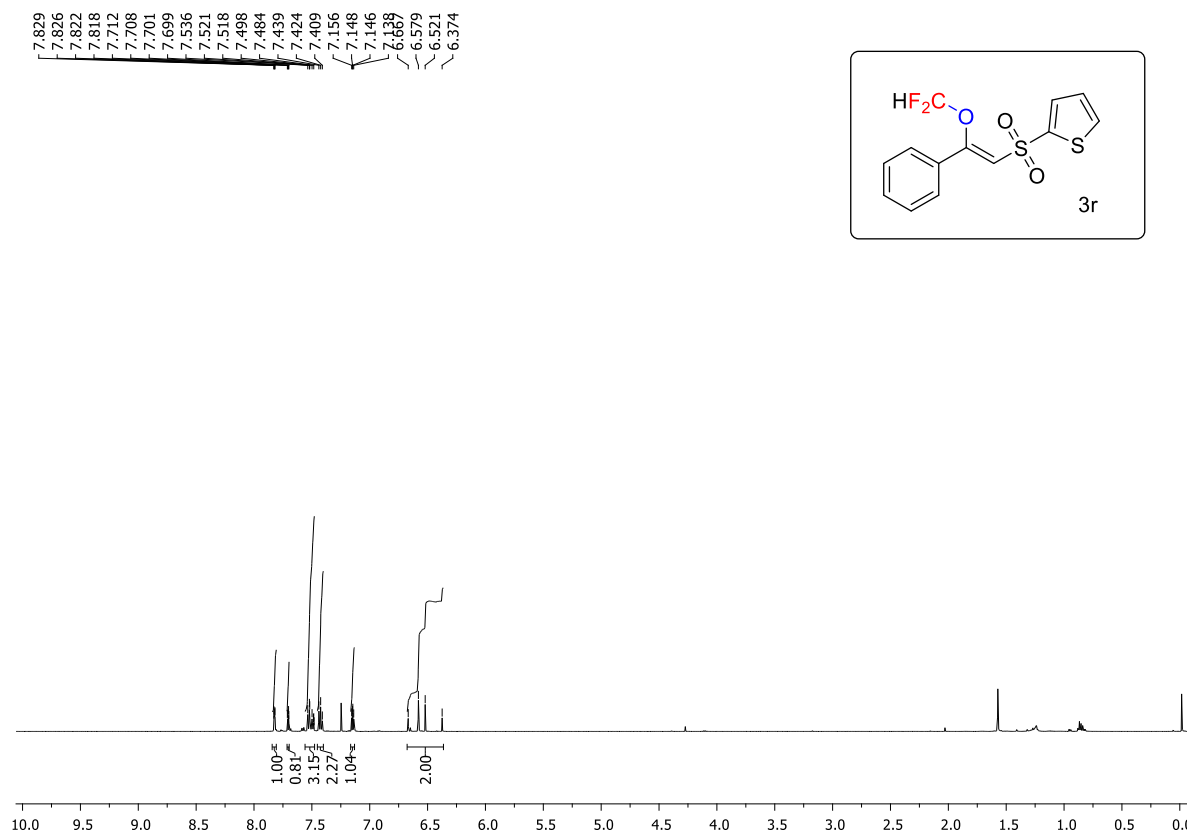

### $^{19}\text{F}$ NMR (471 MHz, $\text{CDCl}_3$ )

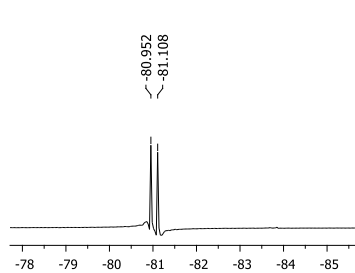

$\delta$  -80.952  
 $\delta$  -81.108

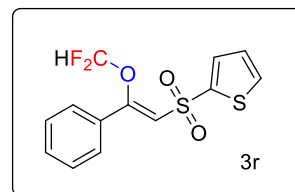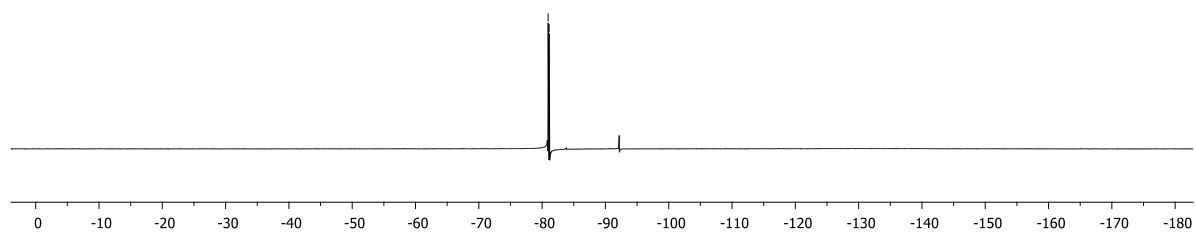

### $^{13}\text{C}\{^1\text{H}\}$ NMR (151 MHz, $\text{CDCl}_3$ )

$\delta$  157.608  
 $\delta$  142.656  
 $\delta$  134.138  
 $\delta$  132.232  
 $\delta$  131.285  
 $\delta$  129.162  
 $\delta$  127.807  
 $\delta$  127.647  
 $\delta$  125.964  
 $\delta$  119.694  
 $\delta$  117.937  
 $\delta$  116.184  
 $\delta$  114.436

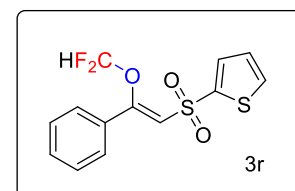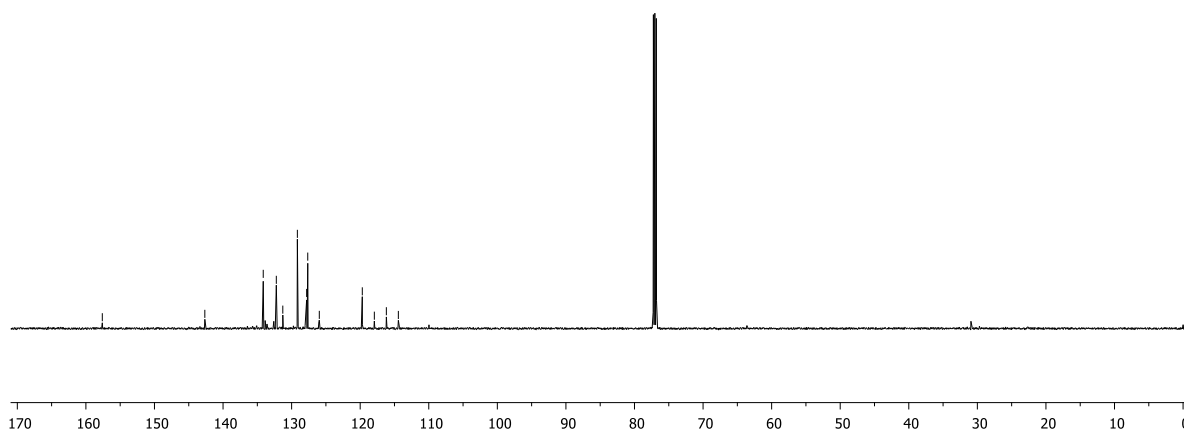

## HRMS of the adduct 5

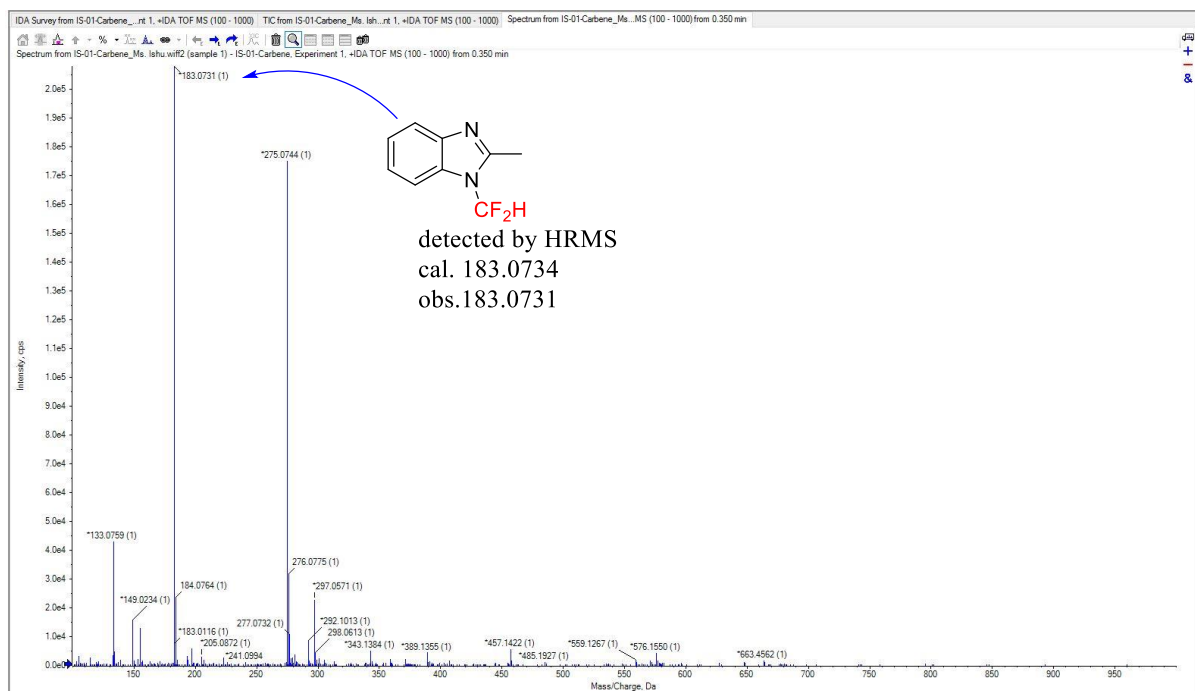

## 2. Crystallographic Data of the Product 3c:

Crystal of the product **3c** was grown by slow evaporation of a solution of the compound in EtOH/hexane.

**Specification:** Crystallographic data measurements were obtained on Rigaku XtaLAB Synergy-i dualflex X-ray diffractometer using graphite monochromated Cu-K $\alpha$  radiation ( $\lambda = 1.54184 \text{ \AA}$ ) based diffraction at 285 K. The extracted data was evaluated using CrysAlisPro CCD software. The crystal structure was solved by direct methods using SHELXT 2018/2, and was refined by the full-matrix least-squares methods through Olex2.

### X-ray Crystallographic Data of the Product 3c

|                                             |                                                                  |
|---------------------------------------------|------------------------------------------------------------------|
| Empirical formula                           | C <sub>19</sub> H <sub>20</sub> F <sub>2</sub> O <sub>3</sub> S  |
| Formula weight                              | 366.432                                                          |
| Temperature/K                               | 285.15                                                           |
| Crystal system                              | monoclinic                                                       |
| Space group                                 | I2/a                                                             |
| a/Å                                         | 21.1418(11)                                                      |
| b/Å                                         | 6.3999(3)                                                        |
| c/Å                                         | 27.7760(13)                                                      |
| $\alpha$ /°                                 | 90                                                               |
| $\beta$ /°                                  | 96.557(4)                                                        |
| $\gamma$ /°                                 | 90                                                               |
| Volume/Å <sup>3</sup>                       | 3733.7(3)                                                        |
| Z                                           | 8                                                                |
| $\rho_{\text{calc}}/\text{cm}^3$            | 1.304                                                            |
| $\mu/\text{mm}^{-1}$                        | 1.843                                                            |
| F(000)                                      | 1544.1                                                           |
| Crystal size/mm <sup>3</sup>                | 0.2 × 0.1 × 0.1                                                  |
| Radiation                                   | Cu K $\alpha$ ( $\lambda = 1.54184$ )                            |
| 2 $\Theta$ range for data collection/°      | 6.4 to 143.7                                                     |
| Index ranges                                | -26 ≤ h ≤ 26, -7 ≤ k ≤ 7, -34 ≤ l ≤ 33                           |
| Reflections collected                       | 12895                                                            |
| Independent reflections                     | 3590 [ $R_{\text{int}} = 0.0887$ , $R_{\text{sigma}} = 0.0918$ ] |
| Data/restraints/parameters                  | 3590/18/227                                                      |
| Goodness-of-fit on F <sup>2</sup>           | 1.041                                                            |
| Final R indexes [ $I \geq 2\sigma(I)$ ]     | $R_1 = 0.1050$ , $wR_2 = 0.2711$                                 |
| Final R indexes [all data]                  | $R_1 = 0.1538$ , $wR_2 = 0.3266$                                 |
| Largest diff. peak/hole / e Å <sup>-3</sup> | 0.89/-0.44                                                       |

# ORTEP Diagram of the Product 3c

ORTEP with 50% thermal ellipsoid probability level

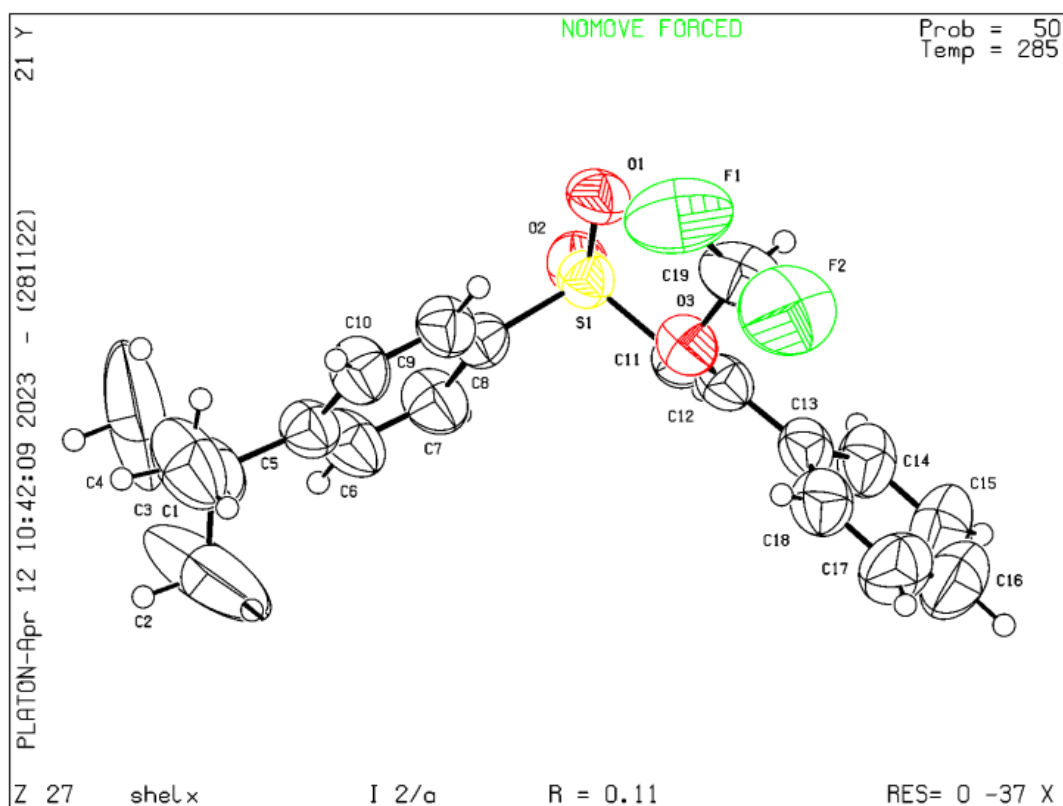

Supplement: d3ob01142a1.pdf [file d3ob01142a1.pdf]
